# Supplementary material for: Cross-talk between signaling pathways: The link between plant secondary metabolite production and wounding stress response
Source: PubMed Central journal article supplement (PMC5390084; doi:10.1038/srep08608), 2015-02-25
Supplement: srep08608-s1.pdf [file srep08608-s1.pdf]

Supplementary Online Material

**Cross-talk between signaling pathways: The link between plant secondary metabolite production and wounding stress response**

Daniel A. Jacobo-Velázquez, Mauricio González-Agüero & Luis Cisneros-Zevallos

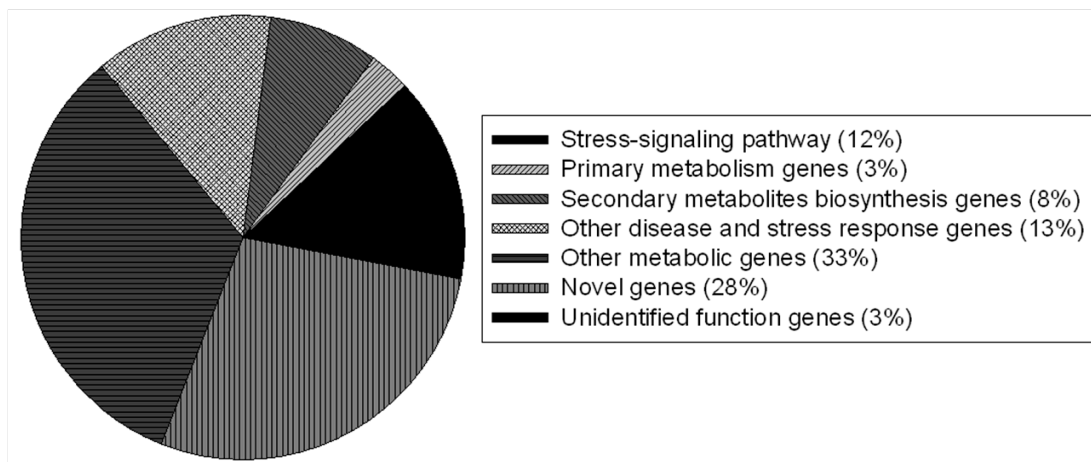

Fig. S1. Functional classification of genes differentially expressed in carrots after wounding stress.

**Table S1. Genes with putative function involved on the biosynthesis and signaling of ethylene, jasmonic acid and reactive oxygen species activated by wounding stress in carrots.**

| Sequence ID <sup>(i)</sup>              | Size (bp) | Gene identification                                                                             | Accession n°       | E-value              | EST redundancy for a gene (%) | Sequence for forward (F) and reverse (R) primers (5' → 3') | Relative expression <sup>(ii)</sup> |
|-----------------------------------------|-----------|-------------------------------------------------------------------------------------------------|--------------------|----------------------|-------------------------------|------------------------------------------------------------|-------------------------------------|
| <i>Ethylene signaling genes</i>         |           |                                                                                                 |                    |                      |                               |                                                            |                                     |
| 2401-G1                                 | 418       | Ethylene-responsive transcription factor 1B, putative [ <i>Ricinus communis</i> , XM_002531493] | In process         | 1x10 <sup>-99</sup>  | 0.10                          | F: TGGCTCTGAAGAAGAAGCATTTCG<br>R: CAGCACCTAAGTCCTCAAACACA  | 107.84±22.34                        |
| <i>Ethylene biosynthesis genes</i>      |           |                                                                                                 |                    |                      |                               |                                                            |                                     |
| 2408-C2                                 | 1175      | S-adenosyl-L-methionine synthetase 1 [ <i>Daucus carota</i> , AY583461]                         | Already registered | 0.0                  | 0.20                          | F: GCAACAACAGGTTTCCTGAAGAC<br>R: TCCCACTTGAGGGGCTTGACTA    | 21.04±4.32                          |
| 2402-D6                                 | 699       | 1-aminocyclopropane-1-carboxylate synthase [ <i>Carica papaya</i> , AM113989]                   | In process         | 1x10 <sup>-59</sup>  | 0.93                          | F: GCTGTTTCTCGCTAATTTGCTG<br>R: ACTGGAAGAAATCGGCATCAAG     | 3.86±0.78                           |
| <i>Jasmonic acid biosynthesis genes</i> |           |                                                                                                 |                    |                      |                               |                                                            |                                     |
| 2405-E7                                 | 520       | Lipoxygenase 2 [ <i>Actinidia deliciosa</i> , DQ497797]                                         | In process         | 4x10 <sup>-128</sup> | 0.20                          | F: TTAAGAGGGGAATGGCAGTTGAG<br>R: GTCTTG TAGTAGAAGCCGCAGTA  | 556.43±61.18                        |
| 2401-F12                                | 374       | Lipoxygenase 5 [ <i>Actinidia deliciosa</i> , DQ497796]                                         | In process         | 1x10 <sup>-58</sup>  | 0.20                          | F: CGACCCTGATGGCGTTTACCT<br>R: TCCAATCTGGGATGTCTCGTTGT     | 498.17±58.91                        |
| 2401-H7                                 | 495       | 12-oxophytodienoate reductase, putative [ <i>Vitis vinifera</i> , XM_002281083]                 | In process         | 4x10 <sup>-116</sup> | 1.34                          | F: GGATGAAAAGTGTAGGAGAGAAG<br>R: CGTAACCCCAAGCAACAATAAA    | 197.04±26.24                        |
| 2406-E9                                 | 383       | Omega-6 fatty acid desaturase [ <i>Petroselinum crispum</i> , U86072]                           | In process         | 2x10 <sup>-157</sup> | 1.23                          | F: ACAACTCATCGGAATGGGATTGG<br>R: AGTATCAGTGATGTTATGGAGCACC | 46.34±9.75                          |

**Table S1. continued.**

|                                                                | Size<br>(bp) | Gene<br>identification                                                                     | Accession<br>n°       | E-value              | EST<br>redundancy<br>for a gene<br>(%) | Sequence for forward (F) and reverse<br>(R) primers (5'→3') | Relative<br>expression <sup>(iii)</sup> |
|----------------------------------------------------------------|--------------|--------------------------------------------------------------------------------------------|-----------------------|----------------------|----------------------------------------|-------------------------------------------------------------|-----------------------------------------|
| <i>Jasmonic acid biosynthesis genes</i>                        |              |                                                                                            |                       |                      |                                        |                                                             |                                         |
| 2406-F4                                                        | 897          | 3-ketoacyl-CoA thiolase B<br>[ <i>Mangifera indica</i> , X75329]                           | In process            | 0.0                  | 1.13                                   | F: CATTTAAGAAGGATGGGACCACA<br>R: GCGGCAAAACTCCTGAATACACC    | 35.96±2.47                              |
| 2406-H7                                                        | 768          | Fatty acid<br>desaturase/hydroxylase<br>[ <i>Daucus carota</i> , AF349965]                 | Already<br>registered | 0.0                  | 0.62                                   | F: CTTGAGAACGACGAGGTTTATGT<br>R: CATTGAACATCAGATACAGAGGGA   | 18.48±5.74                              |
| <i>Reactive oxygen species biosynthesis genes</i>              |              |                                                                                            |                       |                      |                                        |                                                             |                                         |
| 2401-D7                                                        | 555          | NADH-ubiquinone<br>oxidoreductase, putative<br>[ <i>Prunus armeniaca</i> ,<br>AF139496]    | In process            | 6x10 <sup>-146</sup> | 2.05                                   | F: GTGCCAGAAACACTGCCAGAG<br>R: AAGATCAATCCATCCGCCTCAG       | 523.27±43.24                            |
| 2406-C9                                                        | 265          | Glycolate oxidase, putative<br>[ <i>Vitis vinifera</i> ,<br>XM_002278068]                  | In process            | 1x10 <sup>-61</sup>  | 0.30                                   | F: TGATGGTGAGGCTGGTGTGAGT<br>R: GTGTGATCTCTTTGATTGAGCGG     | 27.9±0.48                               |
| <i>Reactive oxygen species modulation/detoxification genes</i> |              |                                                                                            |                       |                      |                                        |                                                             |                                         |
| 2401-B1                                                        | 912          | NADPH:quinone reductase,<br>putative [ <i>Vitis vinifera</i> ,<br>XM_002262940]            | In process            | 2x10 <sup>-85</sup>  | 1.44                                   | F: TTTGAGGAGTTGCCTGAGAAGT<br>R: ATGTGACACCAGGTTTCAGTAAC     | 123.81±33.45                            |
| 2410-E5                                                        | 509          | Glutathione-s-transferase<br>omega, putative [ <i>Ricinus<br/>communis</i> , XM_002525158] | In process            | 1x10 <sup>-72</sup>  | 2.88                                   | F: CCAGATGACCCTGCTAAAAGAGA<br>R: GAGAGCCGTTTCCATGTAATCAA    | 113.98±11.43                            |
| 2402-A6                                                        | 559          | Peroxidase [ <i>Panax ginseng</i> ,<br>AB232686]                                           | In process            | 2x10 <sup>-102</sup> | 0.62                                   | F: GCAAGTGGACCTAGCGAGAAAA<br>R: CCGCAAGAGCAGTAATATCAGC      | 34.10±4.81                              |
| 2405-E8                                                        | 653          | Anionic peroxidase<br>[ <i>Petroselinum crispum</i> ,<br>L36981]                           | In process            | 0.0                  | 0.41                                   | F: TGGTAGGGTTGTTTCTTGTGCTG<br>R: GTTGGCTAAGGTTGCTTCTGTTG    | 30.94±4.29                              |

**Table S1. continued.**

| Sequence ID <sup>(i)</sup>                                     | Size (bp) | Gene identification                                                       | Accession n <sup>o</sup> | E-value              | EST redundancy for a gene (%) | Sequence for forward (F) and reverse (R) primers (5' → 3') | Relative expression <sup>(ii)</sup> |
|----------------------------------------------------------------|-----------|---------------------------------------------------------------------------|--------------------------|----------------------|-------------------------------|------------------------------------------------------------|-------------------------------------|
| <i>Reactive oxygen species modulation/detoxification genes</i> |           |                                                                           |                          |                      |                               |                                                            |                                     |
| 2402-D7                                                        | 561       | Glutathione S-transferase [ <i>Petroselinum crispum</i> , AF177944]       | In process               | 6x10 <sup>-140</sup> | 1.13                          | F: GTATCACATTCTGGACAAGACC<br>R: TTCTCAGAAGTTGGCAATACACC    | 28.72±9.63                          |
| 2407-D2                                                        | 161       | Glutathione peroxidase [ <i>Litchi chinensis</i> , FJ172343]              | In process               | 9x10 <sup>-42</sup>  | 0.10                          | F: AAAGGTGGACTCTTTGGTGATGG<br>R: AATGCTGAGAGGAGAGGTTGTG    | 26.95±4.52                          |
| 2406-D3                                                        | 286       | Thioredoxin H-type 1, putative [ <i>Nicotiana benthamiana</i> , GQ354821] | In process               | 8x10 <sup>-59</sup>  | 0.20                          | F: TGCTAAGAAGATGCCTCATGTCA<br>R: CAACCCTGTCCACAATTATCCCT   | 5.71±0.94                           |
| 2404-E6                                                        | 531       | Peroxiredoxin, putative [ <i>Vitis vinifera</i> , XM_002283616]           | In process               | 3x10 <sup>-105</sup> | 0.10                          | F: TTTGTGATGAAGGCGTGGAAGG<br>R: CAAATCAAGCTCAACCCCGATAG    | 5.45±0.92                           |

(i) Identification number on the SSH library.

(ii) Data represents the mean of three replicates ± standard error of the mean.

**Table S2. Genes with putative function related with the primary metabolism up-regulated by wounding stress in carrots.**

| Sequence ID <sup>(i)</sup>                            | Size (bp) | Gene identification                                                                        | Accession n° | E-value              | EST redundancy for a gene (%) | Sequence for forward (F) and reverse (R) primers (5'→3')    | Relative expression <sup>(ii)</sup> |
|-------------------------------------------------------|-----------|--------------------------------------------------------------------------------------------|--------------|----------------------|-------------------------------|-------------------------------------------------------------|-------------------------------------|
| <i>Glycolysis and pentose phosphate pathway genes</i> |           |                                                                                            |              |                      |                               |                                                             |                                     |
| 2410-E8                                               | 518       | 6-phosphogluconate dehydrogenase, putative [ <i>Populus trichocarpa</i> , XM_002311387]    | In process   | 8x10 <sup>-170</sup> | 0.51                          | F: GCCCTTGTGTTACATACATTGGT<br>R: AGTTCCTCGTTTGAGAGTTTACC    | 14.29±2.45                          |
| 2408-A11                                              | 269       | Fructose-bisphosphate aldolase, putative [ <i>Ricinus communis</i> , XM_002528547]         | In process   | 6x10 <sup>-66</sup>  | 0.20                          | F: AGTTCCCACTGTTGTGTTTTTGTG<br>R: ACTCCATGACTTCTTTGCCTCA    | 6.52±1.36                           |
| 2409-F3                                               | 354       | Cofactor-independent phosphoglyceromutase [ <i>Apium graveolens</i> , AJ132256]            | In process   | 1x10 <sup>-153</sup> | 0.10                          | F: GGCATATGTATGTTACAATGGAC<br>R: TAGCCTTGGGTTCTGCCCTTAG     | 5.49±0.33                           |
| <i>Shikimate pathway genes</i>                        |           |                                                                                            |              |                      |                               |                                                             |                                     |
| 2401-F9                                               | 927       | 3-deoxy-D-arabino-heptulosonate [ <i>Petroselinum crispum</i> , AF012864]                  | In process   | 0.0                  | 0.82                          | F: GATGCTATCAGGGCTGAAGTCAA<br>R: CCTAGATCATCAAAAAGTCACGGTTC | 35.29±4.61                          |
| 2410-E2                                               | 733       | 5-enolpyruvylshikimate 3-phosphate synthase [ <i>Camptotheca acuminata</i> , AY639815]     | In process   | 0.0                  | 0.31                          | F: TAGGAGCAACAGTTGAAGAGGGT<br>R: ATCTGAACAGGCAGCAAGAGAGA    | 25.78±1.04                          |
| <i>Aromatic amino acid biosynthesis genes</i>         |           |                                                                                            |              |                      |                               |                                                             |                                     |
| 243-C5                                                | 459       | Chorismate mutase-prephenate dehydratase, putative [ <i>Vitis vinifera</i> , XM_002268665] | In process   | 2x10 <sup>-82</sup>  | 0.20                          | F: CGAGCACACGTTGACGAAGCTA<br>R: AAATTCCGCAGCTCCAGCAGT       | 29.87±4.42                          |

(i) Identification number on the SSH library.

(ii) Data represents the mean of three replicates ± standard error of the mean.

**Table S3. Genes with putative function related with the biosynthesis of phenolic compounds up-regulated by wounding stress in carrot.**

| Sequence ID <sup>(i)</sup>                      | Size (bp) | Gene identification                                                                                                    | Accession n <sup>o</sup> | E-value              | EST redundancy for a gene (%) | Sequence for forward (F) and reverse (R) primers (5'→3')  | Relative expression <sup>(ii)</sup> |
|-------------------------------------------------|-----------|------------------------------------------------------------------------------------------------------------------------|--------------------------|----------------------|-------------------------------|-----------------------------------------------------------|-------------------------------------|
| <i>Hydroxycinnamic acids biosynthesis genes</i> |           |                                                                                                                        |                          |                      |                               |                                                           |                                     |
| 2407-H10                                        | 733       | 4-coumarate-coa ligase [ <i>Populus trichocarpa</i> , XM_002304328]                                                    | In process               | 6x10 <sup>-97</sup>  | 1.95                          | F: GGGACTACTGGGACTTCCAAAG<br>R: AGCCAAATAAACCATCTCCCAGC   | 2174.63±246.2                       |
| 2411-C9                                         | 866       | Phenylalanine ammonia-lyase (gDcPAL1) [ <i>Daucus carota</i> , D85850]                                                 | Already registered       | 0.0                  | 1.74                          | F: AGGGCAAACCCGAATTTACTGAC<br>R: CATAAGAGCTTCCATCCAAGATG  | 65.37±2.09                          |
| 2405-D9                                         | 392       | Trans-cinnamate 4-monooxygenase [ <i>Petroselinum crispum</i> , L38898]                                                | In process               | 1x10 <sup>-153</sup> | 1.85                          | F: CCTGGAATCATCCTTGCATTGC<br>R: TGTCCCTCCTTCTCTGCTGTGT    | 41.26±4.75                          |
| <i>Flavonoids biosynthesis genes</i>            |           |                                                                                                                        |                          |                      |                               |                                                           |                                     |
| 2406-D5                                         | 364       | Hydroxycinnamoyl-CoA:anthocyanin 3-O-glucoside-6"-O-hydroxycinnamoyltransferase [ <i>Petunia x hybrida</i> , AB026495] | In process               | 7x10 <sup>-48</sup>  | 0.10                          | F: GTTTGATGGGATGGTGTTTTTTGC<br>R: CCTGTCTGCCTCTAGTTTTCTTC | 113.32±23.89                        |
| 2408-E6                                         | 432       | Favone synthase I [ <i>Daucus carota</i> , AY817675]                                                                   | Already registered       | 0.0                  | 0.10                          | F: TCACGGTATTGACAGCGGTTTG<br>R: TCACCCTGAAGATGAGTGGAGA    | 15.25±2.98                          |
| <i>Lignin biosynthesis genes</i>                |           |                                                                                                                        |                          |                      |                               |                                                           |                                     |
| 2407-F2                                         | 602       | Cinnamoyl-CoA reductase [ <i>Codonopsis lanceolata</i> , AB243011]                                                     | In process               | 6x10 <sup>-155</sup> | 0.82                          | F: AATCCCTCAGCAGCAGGAAGATA<br>R: TTGGTAGGCACGGGGTATTTCAG  | 609.15±152.24                       |
| 2409-D9                                         | 513       | Caffeoyl-CoA 3-O-methyltransferase [ <i>Petroselinum crispum</i> , M69184]                                             | In process               | 0.0                  | 0.31                          | F: TATTCTCTCCTTGCCACTGCTCT<br>R: CCCTCTCTGAAGTCAATTTTGTG  | 27.10±4.68                          |
| 2405-F5                                         | 755       | Cinnamyl alcohol dehydrogenase [ <i>Aralia cordata</i> , D13991]                                                       | In process               | 0.0                  | 0.82                          | F: GGAGGCAATGGATCATCTTGGT<br>R: GAGAGGTAAGGTTTCGAGTGGGT   | 16.87±4.72                          |

(i) Identification number on the SSH library.

(ii) Data represents the mean of three replicates ± standard error of the mean.

**Table S4. Genes with putative function related with the biosynthesis of secondary metabolites with health promoting properties up-regulated by wounding stress in carrots.**

| Sequence ID <sup>(i)</sup>               | Size (bp) | Gene identification                                                     | Accession n <sup>o</sup> | E-value              | EST redundancy for a gene (%) | Sequence for forward (F) and reverse (R) primers (5'→3')  | Relative expression <sup>(ii)</sup> |
|------------------------------------------|-----------|-------------------------------------------------------------------------|--------------------------|----------------------|-------------------------------|-----------------------------------------------------------|-------------------------------------|
| <i>Furanocoumarin biosynthesis genes</i> |           |                                                                         |                          |                      |                               |                                                           |                                     |
| 2410-D12                                 | 393       | Bergaptol O-methyltransferase [Glehnia littoralis, AB363638]            | In process               | 5x10 <sup>-144</sup> | 3.08                          | F: CTATGGTTCAACGCATCCTCC<br>R: TGTCCAGCAATAGAGCCACTC      | 12.71±5.26                          |
| <i>Alkaloids biosynthesis gene</i>       |           |                                                                         |                          |                      |                               |                                                           |                                     |
| 2407-H8                                  | 711       | Berberine bridge, putative [Populus trichocarpa, XM_002333922]          | In process               | 6x10 <sup>-116</sup> | 1.13                          | F: TGGGAGAAGACTTATTTTGGGCTA<br>R: AAACAGTGACGGTAGATGGGACA |                                     |
| 2410-F2                                  | 369       | Reticuline oxidase precursor, putative [Ricinus communis, XM_002523118] | In process               | 3x10 <sup>-71</sup>  | 0.51                          | F: CAGGCTGCTGTAGTATGCGTGA<br>R: CAGATCAACCACAACAAACGGTG   |                                     |

(i) Identification number on the SSH library.

(ii) Data represents the mean of three replicates ± standard error of the mean.

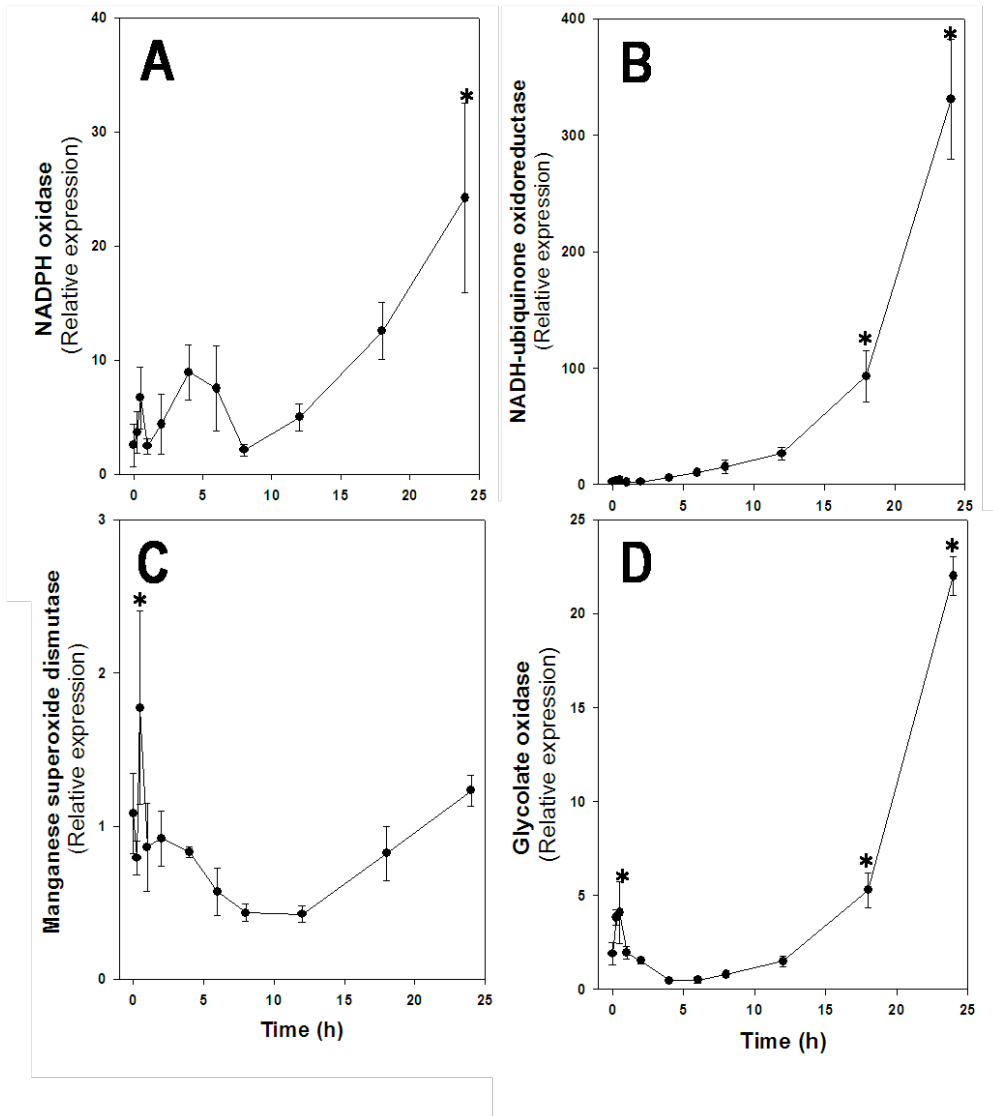

**Fig. S2. Relative expression through time of genes with putative function related with the biosynthesis of reactive oxygen species (ROS) in wounded carrots.** NADPH oxidase (A); NADH-ubiquinone oxidoreductase (B); Manganese superoxide dismutase (MnSOD, C); Glycolate oxidase (GOX, D). Data represents the mean of 4 replicates  $\pm$  standard error of the mean. Data points with an asterisk (\*) indicate statistical difference by the t-test ( $p < 0.05$ ) with respect the relative expression of time 0 h samples.



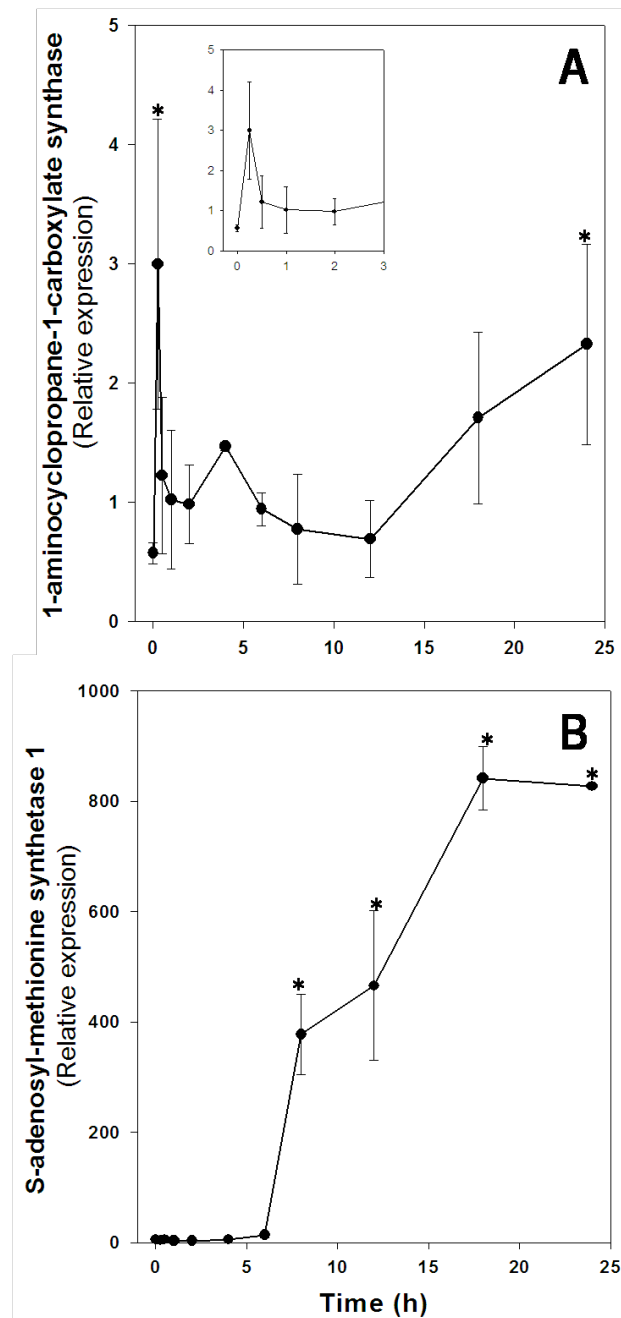

**Fig. S3. Relative expression through time of genes related with the biosynthesis of ethylene (ET) in wounded carrots.** 1-aminocyclopropane-1-carboxylate synthase (ACC synthase, A); S-adenosyl-methionine synthetase 1 (SAM synthetase, B). Data represents the mean of 4 replicates  $\pm$  standard error of the mean. Data points with an asterisk (\*) indicate statistical difference by the t-test ( $p < 0.05$ ) with respect the relative expression of time 0 h samples.

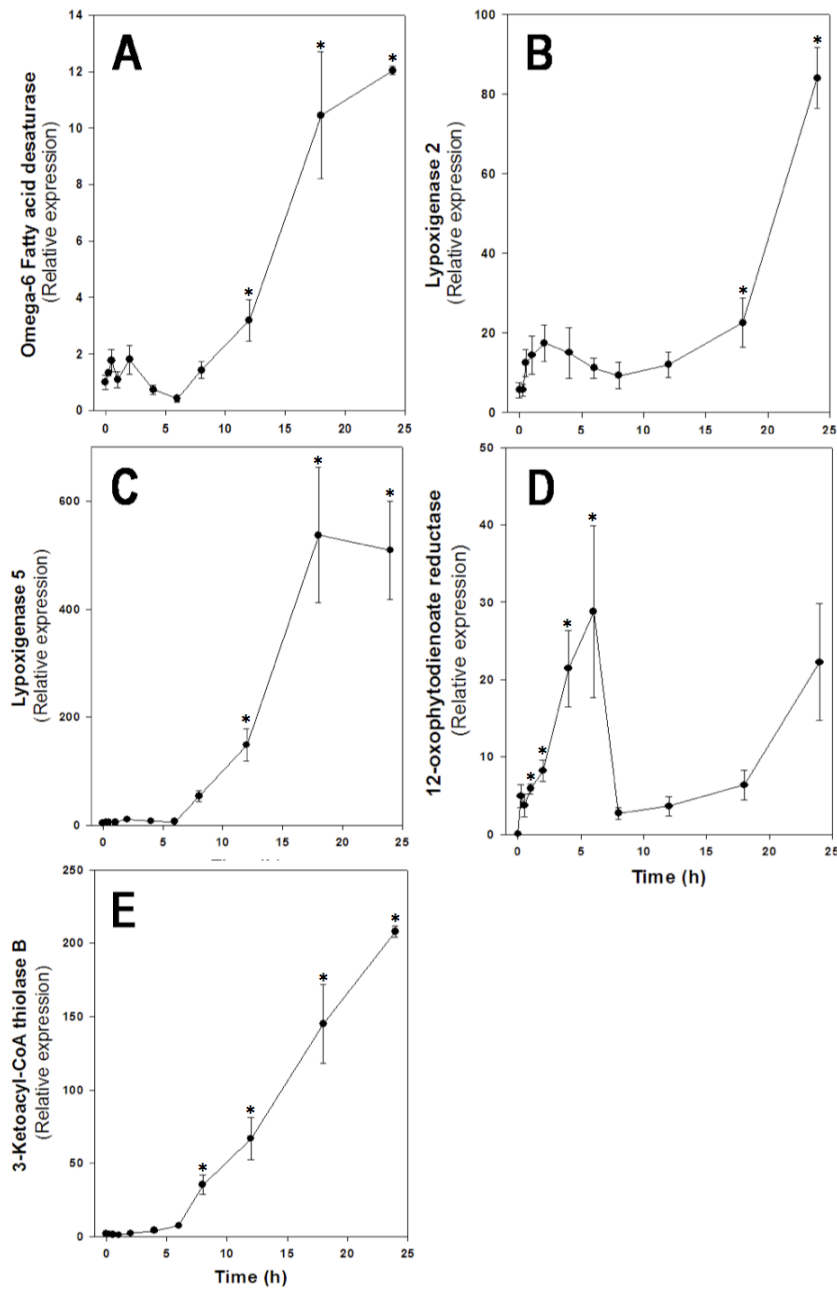

**Fig. S4. Relative expression through time of genes with putative function related with the biosynthesis of jasmonic acid (JA) in wounded carrots.** Omega 6-fatty acid desaturase (A); lipoxygenase 2 (LOX 2, B); lipoxygenase 5 (LOX 5, C); 12-oxo phytodienoate reductase (12-OPDA reductase D); 3-Ketoacyl-CoA thiolase B (3-KCT, E). Data represents the mean of 4 replicates  $\pm$  standard error of the mean. Data points with an asterisk (\*) indicate statistical difference by the t-test ( $p < 0.05$ ) with respect the relative expression of time 0 h samples.

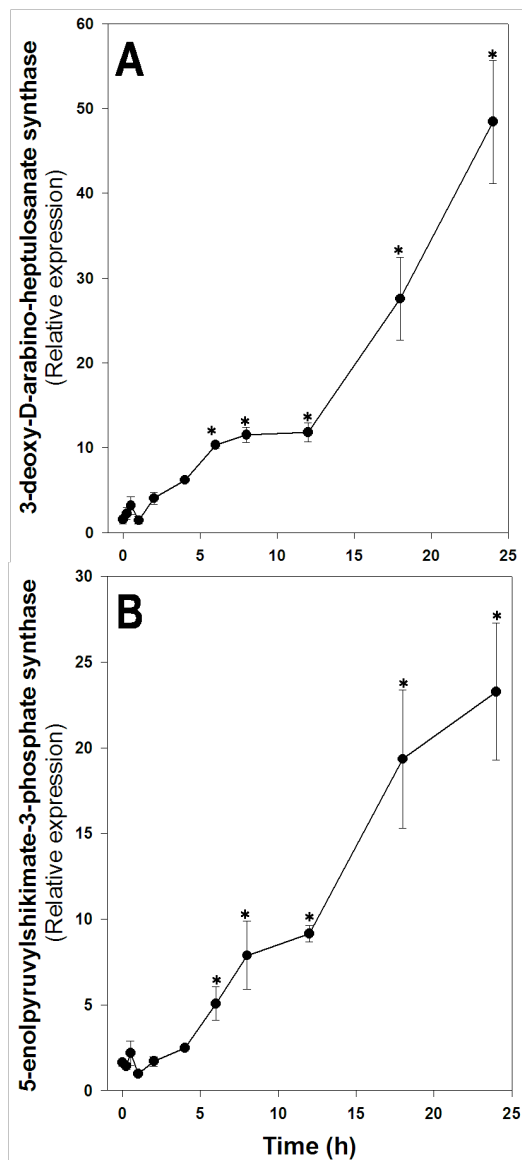

**Fig. S5. Relative expression through time of genes with putative function related with the primary metabolism in wounded carrots.** 3-deoxy-D-arabino-heptulosanate synthase (DAHP synthase, A); 5-enolpyruvylshikimate 3-phosphate synthase (EPSP synthase, B). Data represents the mean of 4 replicates  $\pm$  standard error of the mean. Data points with an asterisk (\*) indicate statistical difference by the t-test ( $p < 0.05$ ) with respect the relative expression of time 0 h samples.

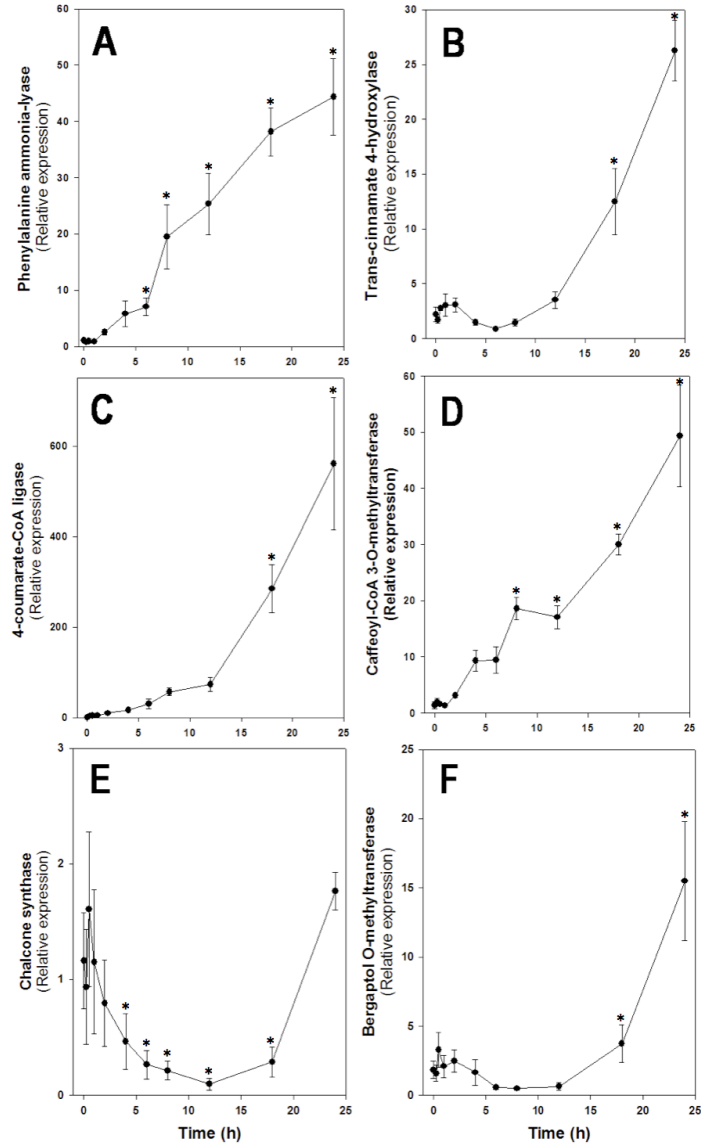

**Fig. S6. Relative expression through time of genes related with the secondary metabolism in wounded carrots.** Phenylalanine ammonia-lyase (PAL, A); Trans-cinnamate 4-hydroxylase (C4H, B); 4-coumarate-CoA ligase (4CL, C); Caffeoyl-CoA 3-O-methyltransferase (CCoAOMT, D); Bergaptol O-methyltransferase (BOMT, E). Data represents the mean of 4 replicates  $\pm$  standard error of the mean. Data points with an asterisk (\*) indicate statistical difference by the t-test ( $p < 0.05$ ) with respect the relative expression of time 0 samples.

**Table S5. Wound-induced subtractive cDNA library from carrots.**

| Sequence ID <sup>(i)</sup>              | Size (bp) | Accession n <sup>o</sup> <sup>(ii)</sup> | E-value                | Redundancy (from 979 secuencias) | Gene Identification                                                                             |
|-----------------------------------------|-----------|------------------------------------------|------------------------|----------------------------------|-------------------------------------------------------------------------------------------------|
| <b>Stress signaling molecules</b>       |           |                                          |                        |                                  |                                                                                                 |
| <i>Ethylene biosynthesis genes</i>      |           |                                          |                        |                                  |                                                                                                 |
| SSH24-2-D6                              | 699       | IN PROCESS                               | 1 x 10 <sup>-99</sup>  | 1                                | 1-aminocyclopropane-1-carboxylate synthase [ <i>Carica papaya</i> , AM113989]                   |
| SSH24-8-C2                              | 1175      | Already registered                       | 0.0                    | 9                                | S-adenosyl-L-methionine synthetase 1 [ <i>Daucus carota</i> , AY583461]                         |
| SSH24-1-C7                              | 540       | IN PROCESS                               | 9 x 10 <sup>-157</sup> | 2                                | Methionine synthase [ <i>Cicer arietinum</i> , EU924156]                                        |
| SSH24-11-E6                             | 152       | IN PROCESS                               | 4 x 10 <sup>-53</sup>  | 1                                | S-adenosylmethionine synthetase [ <i>Petroselinum crispum</i> , M62757]                         |
| SSH24-2-H2                              | 179       | IN PROCESS                               | 8 x 10 <sup>-56</sup>  | 1                                | S-adenosylmethionine synthetase [ <i>Petroselinum crispum</i> , M62758]                         |
| SSH24-2-G8                              | 606       | IN PROCESS                               | 0.0                    | 4                                | S-adenosylhomocysteine hydrolase [ <i>Petroselinum crispum</i> , M81885]                        |
| SSH24-3-A7                              | 379       | IN PROCESS                               | 1 x 10 <sup>-76</sup>  | 1                                | Methylenetetrahydrofolate reductase, putative [ <i>Vitis vinifera</i> , XM_002272694]           |
| SSH24-9-G5                              | 570       | IN PROCESS                               | 0.0                    | 2                                | Methionine synthase, putative [ <i>Vitis vinifera</i> , XM_002276402]                           |
| SSH24-2-B3                              | 570       | IN PROCESS                               | 0.0                    | 1                                | Cobalamine-independent methionine synthase [ <i>Ricinus communis</i> , XM_002525663]            |
| SSH24-1-G1                              | 418       | IN PROCESS                               | 1 x 10 <sup>-59</sup>  | 2                                | Ethylene-responsive transcription factor 1B, putative [ <i>Ricinus communis</i> , XM_002531493] |
| SSH24-1-D9                              | 307       | IN PROCESS                               | 5 x 10 <sup>-87</sup>  | 3                                | Cobalamine-independent methionine synthase [ <i>Coleus blumei</i> , Z49150]                     |
| <i>Jasmonic acid biosynthesis genes</i> |           |                                          |                        |                                  |                                                                                                 |
| SSH24-3-E8                              | 233       | IN PROCESS                               | 1 x 10 <sup>-43</sup>  | 4                                | Microsomal omega-6 desaturase [ <i>Glycine max</i> , AB188250]                                  |
| SSH24-4-D1                              | 595       | IN PROCESS                               | 0.0                    | 3                                | Fatty acid desaturase/hydroxylase, putative [ <i>Petroselinum crispum</i> , AF239834]           |
| SSH24-6-H7                              | 768       | Already registered                       | 0.0                    | 3                                | Fatty acid desaturase/hydroxylase [ <i>Daucus carota</i> , AF349965]                            |
| SSH24-7-G7                              | 134       | Already registered                       | 8 x 10 <sup>-48</sup>  | 3                                | 12-oxophytodienoate reductase, putative [ <i>Daucus carota</i> , AJ297421]                      |
|                                         |           |                                          |                        |                                  |                                                                                                 |

| Sequence ID <sup>(i)</sup> | Size (bp) | Accession n <sup>o</sup> <sup>(ii)</sup> | E-value                | Redundancy (from 979 sequences) | Gene Identification                                                                            |
|----------------------------|-----------|------------------------------------------|------------------------|---------------------------------|------------------------------------------------------------------------------------------------|
| SSH24-3-D5                 | 336       | IN PROCESS                               | 2 x 10 <sup>-79</sup>  | 4                               | 3-hydroxyacyl-CoA dehydrogenase, putative [ <i>Populus trichocarpa</i> , XM_002324390]         |
| SSH24-1-G11                | 492       | Already registered                       | 0.0                    | 7                               | Delta12-fatty acid acetylenase [ <i>Daucus carota</i> , AY166774]                              |
| SSH24-5-G10                | 397       | IN PROCESS                               | 6 x 10 <sup>-05</sup>  | 1                               | Oleic acid desaturase [ <i>Sesamum indicum</i> , AY770501]                                     |
| SSH24-6-B6                 | 223       | IN PROCESS                               | 1 x 10 <sup>-36</sup>  | 4                               | Microsomal omega-6-desaturase [ <i>Glycine max</i> , AY954300]                                 |
| SSH24-1-F12                | 374       | IN PROCESS                               | 1 x 10 <sup>-58</sup>  | 2                               | Lipoxygenase 5 [ <i>Actinidia deliciosa</i> , DQ497796]                                        |
| SSH24-5-E7                 | 520       | IN PROCESS                               | 4 x 10 <sup>-128</sup> | 2                               | Lipoxygenase 2 [ <i>Actinidia deliciosa</i> , DQ497797]                                        |
| SSH24-10-F8                | 159       | IN PROCESS                               | 4 x 10 <sup>-21</sup>  | 1                               | Delta-12 desaturase [ <i>Lepidium virginicum</i> , DQ518315]                                   |
| SSH24-9-E4                 | 116       | IN PROCESS                               | 8 x 10 <sup>-15</sup>  | 1                               | Delta-12 desaturase [ <i>Lepidium virginicum</i> , DQ518318]                                   |
| SSH24-5-A7                 | 651       | IN PROCESS                               | 1 x 10 <sup>-74</sup>  | 1                               | Omega-6 fatty acid desaturase 2 [ <i>Portulaca oleracea</i> , FJ472350]                        |
| SSH24-6-E9                 | 383       | IN PROCESS                               | 2 x 10 <sup>-157</sup> | 1                               | Omega-6 fatty acid desaturase [ <i>Petroselinum crispum</i> , U86072]                          |
| SSH24-4-B7                 | 651       | IN PROCESS                               | 2 x 10 <sup>-75</sup>  | 3                               | D12 oleate desaturase [ <i>Solanum commersonii</i> , X92847]                                   |
| SSH24-6-D1                 | 252       | IN PROCESS                               | 5 x 10 <sup>-29</sup>  | 1                               | Delta12 fatty acid desaturase, putative [ <i>Vitis vinifera</i> , XM_002279203]                |
| SSH24-1-H7                 | 495       | IN PROCESS                               | 4 x 10 <sup>-116</sup> | 8                               | 12-oxophytodienoate reductase, putative [ <i>Vitis vinifera</i> , XM_002281083]                |
| SSH24-5-B6                 | 971       | IN PROCESS                               | 0.0                    | 3                               | 3-ketoacyl-CoA thiolase, putative [ <i>Populus trichocarpa</i> , XM_002301534]                 |
| SSH24-3-G5                 | 504       | IN PROCESS                               | 5 x 10 <sup>-83</sup>  | 1                               | Delta12 fatty acid desaturase, putative [ <i>Populus trichocarpa</i> , XM_002323248]           |
| SSH24-3-B11                | 449       | IN PROCESS                               | 3 x 10 <sup>-104</sup> | 3                               | 12-oxophytodienoic acid 10,10-reductase, putative [ <i>Populus trichocarpa</i> , XM_002327253] |
| SSH24-9-E5                 | 329       | IN PROCESS                               | 1 x 10 <sup>-64</sup>  | 1                               | 12-oxophytodienoate reductase, putative [ <i>Populus trichocarpa</i> , XM_002336702]           |
| SSH24-7-A1                 | 288       | IN PROCESS                               | 8 x 10 <sup>-65</sup>  | 6                               | 3-ketoacyl-CoA thiolase B, putative [ <i>Ricinus communis</i> , XM_002521077]                  |
| SSH24-6-F4                 | 897       | IN PROCESS                               | 0.0                    | 1                               | 3-ketoacyl-CoA thiolase B [ <i>Mangifera indica</i> , XR_077410]                               |
| SSH24-10-C7                | 265       | IN PROCESS                               | 6 x 10 <sup>-173</sup> | 1                               | 3-ketoacyl-CoA thiolase [ <i>Populus trichocarpa</i> , XM_002299248]                           |
|                            |           |                                          |                        |                                 |                                                                                                |

| Sequence ID <sup>(i)</sup>                                                      | Size (bp) | Accession n <sup>o</sup> <sup>(ii)</sup> | E-value                | Redundancy (from 979 sequences) | Gene Identification                                                                 |
|---------------------------------------------------------------------------------|-----------|------------------------------------------|------------------------|---------------------------------|-------------------------------------------------------------------------------------|
| SSH24-8-B9                                                                      | 905       | IN PROCESS                               | 1 x 10 <sup>-11</sup>  | 1                               | 2,4-dienoyl-CoA reductase, putative [ <i>Ricinus communis</i> , XM_002517269]       |
| SSH24-9-F8                                                                      | 397       | IN PROCESS                               | 8 x 10 <sup>-04</sup>  | 1                               | Microsomal oleic acid desaturase [ <i>Sesamum indicum</i> , AY770501]               |
| <b>Reactive oxygen species biosynthesis and modulation/detoxification genes</b> |           |                                          |                        |                                 |                                                                                     |
| SSH24-1-D7                                                                      | 555       | IN PROCESS                               | 6 x 10 <sup>-146</sup> | 20                              | NADH-ubiquinone oxidoreductase, putative [ <i>Prunus armeniaca</i> , AF139496]      |
| SSH24-2-D7                                                                      | 561       | IN PROCESS                               | 6 x 10 <sup>-140</sup> | 9                               | Glutathione S-transferase [ <i>Petroselinum crispum</i> , AF177944]                 |
| SSH24-1-B1                                                                      | 912       | IN PROCESS                               | 2 x 10 <sup>-85</sup>  | 14                              | NADPH:quinone reductase [ <i>Populus trichocarpa</i> , EF144480]                    |
| SSH24-7-D2                                                                      | 161       | IN PROCESS                               | 9 x 10 <sup>-42</sup>  | 1                               | Glutathione peroxidase [ <i>Litchi chinensis</i> , FJ172343]                        |
| SSH24-8-F5                                                                      | 548       | IN PROCESS                               | 1 x 10 <sup>-177</sup> | 2                               | NADPH:quinone reductase, putative [ <i>Vitis vinifera</i> , XM_002267141]           |
| SSH24-11-C4                                                                     | 631       | IN PROCESS                               | 3 x 10 <sup>-69</sup>  | 1                               | Glutathione S-transferase, putative [ <i>Vitis vinifera</i> , XM_002275846]         |
| SSH24-6-D3                                                                      | 286       | IN PROCESS                               | 8 x 10 <sup>-59</sup>  | 2                               | Thioredoxin H-type 1, putative [ <i>Vitis vinifera</i> , XM_002280537]              |
| SSH24-6-C9                                                                      | 265       | IN PROCESS                               | 1 x 10 <sup>-61</sup>  | 3                               | Glycolate oxidase, putative [ <i>Vitis vinifera</i> , XM_002278068]                 |
| SSH24-4-E6                                                                      | 531       | IN PROCESS                               | 3 x 10 <sup>-105</sup> | 1                               | Peroxiredoxin, putative [ <i>Vitis vinifera</i> , XM_002283616]                     |
| SSH24-6-G9                                                                      | 223       | IN PROCESS                               | 5 x 10 <sup>-47</sup>  | 5                               | Peroxidase 12 precursor, putative [ <i>Ricinus communis</i> , XM_002524270]         |
| SSH24-10-E5                                                                     | 509       | IN PROCESS                               | 1 x 10 <sup>-72</sup>  | 25                              | Glutathione-s-transferase omega, putative [ <i>Ricinus communis</i> , XM_002525158] |
| SSH24-10-H9                                                                     | 299       | IN PROCESS                               | 7 x 10 <sup>-66</sup>  | 1                               | NADH-ubiquinone oxidoreductase, putative [ <i>Ricinus communis</i> , XM_002531885]  |
| SSH24-5-E8                                                                      | 653       | IN PROCESS                               | 0.0                    | 4                               | Anionic peroxidase [ <i>Petroselinum crispum</i> , L36981]                          |
| SSH24-10-H2                                                                     | 595       | IN PROCESS                               | 9 x 10 <sup>-94</sup>  | 1                               | Laccase, putative [ <i>Vitis vinifera</i> , XM_002272582]                           |
| SSH24-6-G8                                                                      | 337       | IN PROCESS                               | 7 x 10 <sup>-45</sup>  | 1                               | Anionic peroxidase precursor, putative [ <i>Ricinus communis</i> , XM_002521822]    |
| SSH24-2-A6                                                                      | 559       | IN PROCESS                               | 2 x 10 <sup>-102</sup> | 6                               | Peroxidase [ <i>Panax ginseng</i> , AB232686]                                       |
| SSH24-7-A10                                                                     | 403       | IN PROCESS                               | 1 x 10 <sup>-26</sup>  | 2                               | Glutathione S-transferase, putative [ <i>Vitis vinifera</i> , XM_002273835]         |
|                                                                                 |           |                                          |                        |                                 |                                                                                     |

| Sequence ID <sup>(i)</sup>                                                                 | Size (bp) | Accession n <sup>o</sup> <sup>(ii)</sup> | E-value                | Redundancy (from 979 sequences) | Gene Identification                                                                       |
|--------------------------------------------------------------------------------------------|-----------|------------------------------------------|------------------------|---------------------------------|-------------------------------------------------------------------------------------------|
| SSH24-8-E1                                                                                 | 237       | IN PROCESS                               | 2 x 10 <sup>-14</sup>  | 2                               | Glutathione s-transferase, putative [ <i>Ricinus communis</i> , XM_002523950]             |
| <b>Genes involved in signaling the NADPH oxidase production of reactive oxygen species</b> |           |                                          |                        |                                 |                                                                                           |
| SSH24-7-A11                                                                                | 731       | IN PROCESS                               | 0.0                    | 3                               | ATP-binding cassette transporter, putative [ <i>Vitis vinifera</i> , XR_078070]           |
| SSH24-2-B10                                                                                | 347       | IN PROCESS                               | 2 x 10 <sup>-05</sup>  | 1                               | ATP-binding cassette transporter, putative [ <i>Ricinus communis</i> , XM_002527284]      |
| SSH24-8-H9                                                                                 | 216       | IN PROCESS                               | 1 x 10 <sup>-42</sup>  | 1                               | ATP-binding cassette transporter, putative [ <i>Populus trichocarpa</i> , XM_002304676]   |
| SSH24-10-G1                                                                                | 923       | Already registered                       | 0.0                    | 41                              | Exo-polygalacturonase [ <i>Daucus carota</i> , D29664]                                    |
| SSH24-6-F11                                                                                | 444       | IN PROCESS                               | 3 x 10 <sup>-14</sup>  | 1                               | Calcium-binding protein [ <i>Olea europaea</i> , AF078680]                                |
| SSH24-7-C5                                                                                 | 534       | IN PROCESS                               | 2 x 10 <sup>-12</sup>  | 1                               | Calcium-binding protein, putative [ <i>Populus trichocarpa</i> , XM_002312286]            |
| <b>Carbon source</b>                                                                       |           |                                          |                        |                                 |                                                                                           |
| <b>Sugars transport genes</b>                                                              |           |                                          |                        |                                 |                                                                                           |
| SSH24-1-E12                                                                                | 330       | IN PROCESS                               | 1 x 10 <sup>-81</sup>  | 3                               | Hexose transporte-like protein [ <i>Apium graveolens</i> , AF393808]                      |
| SSH24-3-F2                                                                                 | 340       | IN PROCESS                               | 6 x 10 <sup>-61</sup>  | 2                               | Sugar transporter, putative [ <i>Ricinus communis</i> , XM_002510945]                     |
| SSH24-2-D1                                                                                 | 167       | IN PROCESS                               | 6 x 10 <sup>-19</sup>  | 1                               | Sugar transporter, putative [ <i>Ricinus communis</i> , XM_002517170]                     |
| <b>Glycolysis and pentose phosphate pathway genes</b>                                      |           |                                          |                        |                                 |                                                                                           |
| SSH24-9-F3                                                                                 | 354       | IN PROCESS                               | 1 x 10 <sup>-153</sup> | 1                               | Cofactor-independent phosphoglyceromutase [ <i>Apium graveolens</i> , AJ132256]           |
| SSH24-8-G9                                                                                 | 518       | IN PROCESS                               | 3 x 10 <sup>-169</sup> | 3                               | 6-phosphogluconate dehydrogenase, putative [ <i>Vitis vinifera</i> , XM_002270948]        |
| SSH24-9-H6                                                                                 | 191       | IN PROCESS                               | 2 x 10 <sup>-51</sup>  | 1                               | Fructose-1,6-bisphosphate aldolase, putative [ <i>Vitis vinifera</i> , XM_002283345]      |
| SSH24-10-E8                                                                                | 518       | IN PROCESS                               | 8 x 10 <sup>-170</sup> | 2                               | 6-phosphogluconate dehydrogenase, putative [ <i>Populus trichocarpa</i> , XM_002311387.1] |
| SSH24-8-A11                                                                                | 269       | IN PROCESS                               | 6 x 10 <sup>-66</sup>  | 1                               | Fructose-1,6-bisphosphate aldolase, putative [ <i>Vitis vinifera</i> , XM_002283345]      |



| Sequence ID <sup>(i)</sup>                      | Size (bp) | Accession n <sup>o</sup> <sup>(ii)</sup> | E-value              | Redundancy (from 979 sequences) | Gene Identification                                                                                        |
|-------------------------------------------------|-----------|------------------------------------------|----------------------|---------------------------------|------------------------------------------------------------------------------------------------------------|
| <b>Shikimate pathway genes</b>                  |           |                                          |                      |                                 |                                                                                                            |
| SSH24-1-F9                                      | 927       | IN PROCESS                               | 0.0                  | 8                               | 3-deoxy-D-arabino-heptulosonate [ <i>Petroselinum crispum</i> , AF012864]                                  |
| SSH24-10-E2                                     | 733       | IN PROCESS                               | 0.0                  | 3                               | 5-enolpyruvylshikimate 3-phosphate synthase [ <i>Camptotheca acuminata</i> , AY639815]                     |
| <b>Aromatic amino acid biosynthesis genes</b>   |           |                                          |                      |                                 |                                                                                                            |
| SSH24-4-D12                                     | 101       | IN PROCESS                               | $2 \times 10^{-15}$  | 1                               | Chorismate mutase, putative [ <i>Vitis vinifera</i> , XM_002284083]                                        |
| SSH24-3-C5                                      | 459       | IN PROCESS                               | $2 \times 10^{-82}$  | 2                               | Chorismate mutase-prephenate dehydratase, putative [ <i>Vitis vinifera</i> , XM_002268665]                 |
| SSH24-9-D7                                      | 148       | IN PROCESS                               | $5 \times 10^{-32}$  | 3                               | Prephenate dehydratase, putative [ <i>Ricinus communis</i> , XM_002527418]                                 |
| <b>Secondary metabolites biosynthesis genes</b> |           |                                          |                      |                                 |                                                                                                            |
| <b>Phenolic metabolism genes</b>                |           |                                          |                      |                                 |                                                                                                            |
| <i>Hydroxycinnamic acids biosynthesis genes</i> |           |                                          |                      |                                 |                                                                                                            |
| SSH24-3-A9                                      | 333       | IN PROCESS                               | $3 \times 10^{-128}$ | 11                              | Cinnamate 4-hydroxylase [ <i>Ammi majus</i> , AY219918]                                                    |
| SSH24-11-C9                                     | 866       | Already registered                       | 0.0                  | 17                              | Phenylalanine ammonia-lyase (gDcPAL1) [ <i>Daucus carota</i> , D85850]                                     |
| SSH24-5-D9                                      | 392       | IN PROCESS                               | $1 \times 10^{-153}$ | 7                               | Trans-cinnamate 4-monooxygenase [ <i>Petroselinum crispum</i> , L38898]                                    |
| SSH24-2-G6                                      | 495       | IN PROCESS                               | $1 \times 10^{-172}$ | 2                               | 4-coumarate-coa ligase [ <i>Petroselinum crispum</i> , X13325]                                             |
| SSH24-4-E3                                      | 289       | IN PROCESS                               | $5 \times 10^{-30}$  | 10                              | 4-coumarate-coa ligase [ <i>Vitis vinifera</i> , XM_002270324]                                             |
| SSH24-7-H10                                     | 733       | IN PROCESS                               | $6 \times 10^{-97}$  | 9                               | 4-coumarate-coa ligase [ <i>Populus trichocarpa</i> , XM_002304328]                                        |
| <b>Flavonoids biosynthesis genes</b>            |           |                                          |                      |                                 |                                                                                                            |
| SSH24-7-E10                                     | 432       | IN PROCESS                               | $3 \times 10^{-160}$ | 1                               | Glycosyltransferase, putative [ <i>Lycium barbarum</i> , AB360610]                                         |
| SSH24-5-F9                                      | 936       | Already registered                       | $2 \times 10^{-104}$ | 3                               | Chalcone synthase 2 [ <i>Daucus carota</i> , AJ006780]                                                     |
| SSH24-5-G11                                     | 813       | IN PROCESS                               | $9 \times 10^{-58}$  | 3                               | Tetrahydrochalcone 2'-glucosyltransferase [ <i>Catharanthus roseus</i> , AB294401]                         |
| SSH24-6-D5                                      | 364       | IN PROCESS                               | $7 \times 10^{-48}$  | 1                               | Hydroxycinnamoyl-CoA:anthocyanin 3-O-glucoside-6"-O-acyltransferase [ <i>Petunia x hybrida</i> , AB026495] |
| SSH24-8-E6                                      | 432       | Already registered                       | 0.0                  | 1                               | Favone synthase I [ <i>Daucus carota</i> , AY817675]                                                       |

| Sequence ID <sup>(i)</sup>                         | Size (bp) | Accession n <sup>o</sup> <sup>(ii)</sup> | E-value                | Redundancy (from 979 sequences) | Gene Identification                                                                           |
|----------------------------------------------------|-----------|------------------------------------------|------------------------|---------------------------------|-----------------------------------------------------------------------------------------------|
| <i>Lignin biosynthesis genes</i>                   |           |                                          |                        |                                 |                                                                                               |
| SSH24-7-F2                                         | 602       | IN PROCESS                               | 6 x 10 <sup>-155</sup> | 4                               | Cinnamoyl-CoA reductase [ <i>Codonopsis lanceolata</i> , AB243011]                            |
| SSH24-7-G3                                         | 196       | IN PROCESS                               | 4 x 10 <sup>-28</sup>  | 1                               | NADPH-dependent cinnamyl alcohol dehydrogenase [ <i>Quercus suber</i> , AY362455]             |
| SSH24-6-F12                                        | 516       | IN PROCESS                               | 0.0                    | 1                               | Caffeoyl-CoA O-methyltransferase [ <i>Ammi majus</i> , AY620245]                              |
| SSH24-5-F5                                         | 755       | IN PROCESS                               | 0.0                    | 1                               | Cinnamyl alcohol dehydrogenase [ <i>Aralia cordata</i> , D13991]                              |
| SSH24-1-C12                                        | 465       | IN PROCESS                               | 2 x 10 <sup>-112</sup> | 1                               | Cinnamoyl-CoA reductase-like [ <i>Panax ginseng</i> , FJ002428]                               |
| SSH24-4-G11                                        | 138       | IN PROCESS                               | 1 x 10 <sup>-25</sup>  | 1                               | Cinnamoyl CoA reductase [ <i>Betula luminifera</i> , FJ410450]                                |
| SSH24-9-D9                                         | 513       | IN PROCESS                               | 0.0                    | 2                               | Caffeoyl-CoA 3-O-methyltransferase [ <i>Petroselinum crispum</i> , M69184]                    |
| SSH24-11-D2                                        | 215       | IN PROCESS                               | 6 x 10 <sup>-27</sup>  | 2                               | Cinnamoyl-CoA reductase [ <i>Populus trichocarpa</i> , XM_002332042]                          |
| <i>Lignans biosynthesis genes</i>                  |           |                                          |                        |                                 |                                                                                               |
| SSH24-8-H7                                         | 813       | IN PROCESS                               | 1 x 10 <sup>-175</sup> | 9                               | Isoflavone reductase-like protein 5 [ <i>Vitis vinifera</i> , BN000710]                       |
| <i>Furanocoumarin biosynthesis genes</i>           |           |                                          |                        |                                 |                                                                                               |
| SSH24-10-D12                                       | 393       | IN PROCESS                               | 5 x 10 <sup>-144</sup> | 30                              | Bergaptol O-methyltransferase [ <i>Glehnia littoralis</i> , AB363638]                         |
| <i>Volatile benzenoid ester biosynthesis genes</i> |           |                                          |                        |                                 |                                                                                               |
| SSH24-7-G9                                         | 479       | IN PROCESS                               | 1 x 10 <sup>-49</sup>  | 7                               | Benzoyl coenzyme A: benzyl alcohol benzoyl transferase [ <i>Nicotiana tabacum</i> , AF500202] |
| SSH24-2-B12                                        | 577       | IN PROCESS                               | 6 x 10 <sup>-14</sup>  | 1                               | Benzoyl coenzyme A: benzyl alcohol benzoyl transferase [ <i>Petunia x hybrida</i> , AY563157] |
| <i>Cardenolide pathway genes</i>                   |           |                                          |                        |                                 |                                                                                               |
| SSH24-5-B4                                         | 298       | IN PROCESS                               | 4 x 10 <sup>-56</sup>  | 2                               | Progesterone 5-beta-reductase [ <i>Digitalis lutea</i> , DQ213021]                            |
| <i>Alkaloids biosynthesis genes</i>                |           |                                          |                        |                                 |                                                                                               |
| SSH24-4-D5                                         | 264       | IN PROCESS                               | 2 x 10 <sup>-10</sup>  | 9                               | Berberine bridge, putative [ <i>Panax ginseng</i> , DQ384527]                                 |
| SSH24-6-A11                                        | 188       | IN PROCESS                               | 1 x 10 <sup>-21</sup>  | 1                               | Berberine bridge, putative [ <i>Arabidopsis thaliana</i> , NM_100078.2]                       |
| SSH24-6-C8                                         | 326       | IN PROCESS                               | 1 x 10 <sup>-12</sup>  | 2                               | Berberine bridge, putative [ <i>Vitis vinifera</i> , XM_002268325]                            |
| SSH24-3-D12                                        | 306       | IN PROCESS                               | 1 x 10 <sup>-05</sup>  | 4                               | Berberine bridge, putative [ <i>Vitis vinifera</i> , XM_002268570]                            |
|                                                    |           |                                          |                        |                                 |                                                                                               |

| Sequence ID <sup>(i)</sup>                     | Size (bp) | Accession n <sup>o</sup> <sup>(ii)</sup> | E-value                | Redundancy (from 979 sequences) | Gene Identification                                                                           |
|------------------------------------------------|-----------|------------------------------------------|------------------------|---------------------------------|-----------------------------------------------------------------------------------------------|
| SSH24-3-C8                                     | 336       | IN PROCESS                               | 2 x 10 <sup>-41</sup>  | 3                               | Reticuline oxidase precursor, putative [ <i>Vitis vinifera</i> , XM_002266993]                |
| SSH24-4-E7                                     | 525       | IN PROCESS                               | 8 x 10 <sup>-75</sup>  | 6                               | Reticuline oxidase precursor, putative [ <i>Vitis vinifera</i> , XM_002269426]                |
| SSH24-7-H8                                     | 711       | IN PROCESS                               | 6 x 10 <sup>-116</sup> | 3                               | Reticuline oxidase precursor, putative [ <i>Populus trichocarpa</i> , XM_002333922]           |
| SSH24-3-D4                                     | 187       | IN PROCESS                               | 3 x 10 <sup>-17</sup>  | 3                               | Reticuline oxidase precursor, putative [ <i>Ricinus communis</i> , XM_002523110]              |
| SSH24-10-F2                                    | 369       | IN PROCESS                               | 3 x 10 <sup>-71</sup>  | 1                               | Reticuline oxidase precursor, putative [ <i>Ricinus communis</i> , XM_002523118]              |
| SSH24-3-C11                                    | 524       | IN PROCESS                               | 2 x 10 <sup>-82</sup>  | 1                               | Reticuline oxidase precursor, putative [ <i>Ricinus communis</i> , XM_002538779]              |
| SSH24-9-F9                                     | 427       | IN PROCESS                               | 2 x 10 <sup>-42</sup>  | 1                               | Reticuline oxidase precursor, putative [ <i>Ricinus communis</i> , XM_002523116]              |
| SSH24-5-F3                                     | 962       | IN PROCESS                               | 2 x 10 <sup>-10</sup>  | 1                               | Polyneuridine-aldehyde esterase precursor, putative [ <i>Ricinus communis</i> , XM_002522306] |
| SSH24-4-G1                                     | 375       | IN PROCESS                               | 3 x 10 <sup>-98</sup>  | 1                               | S-norococlaurine synthase 2 [ <i>Papaver somniferum</i> , AY860501]                           |
| <b>Phenylpropane biosynthesis genes</b>        |           |                                          |                        |                                 |                                                                                               |
| SSH24-5-G12                                    | 404       | IN PROCESS                               | 3 x 10 <sup>-59</sup>  | 1                               | SAM:t-anol/iso Eugenol O-methyltransferase [ <i>Pimpinella anisum</i> , EU925389]             |
| <b>Terpenoids biosynthesis genes</b>           |           |                                          |                        |                                 |                                                                                               |
| SSH24-10-C5                                    | 144       | IN PROCESS                               | 6 x 10 <sup>-23</sup>  | 1                               | 1-deoxy-D-xylulose 5-phosphate reductoisomerase [ <i>Arabidopsis thaliana</i> , NM_125674.2]  |
| <b>Phytosterols biosynthesis genes</b>         |           |                                          |                        |                                 |                                                                                               |
| SSH24-2-A2                                     | 427       | IN PROCESS                               | 7 x 10 <sup>-87</sup>  | 1                               | Sterol 22-desaturase, similar [ <i>Vitis vinifera</i> , XM_002276577]                         |
| SSH24-10-C11                                   | 312       | IN PROCESS                               | 2 x 10 <sup>-40</sup>  | 3                               | Sterol desaturase, putative [ <i>Ricinus communis</i> , XM_002526466]                         |
| SSH24-10-C2                                    | 310       | IN PROCESS                               | 4 x 10 <sup>-37</sup>  | 1                               | Sterol desaturase, putative [ <i>Ricinus communis</i> , XM_002526465]                         |
| <b>Other disease and stress response genes</b> |           |                                          |                        |                                 |                                                                                               |
| SSH24-5-C7                                     | 689       | IN PROCESS                               | 1 x 10 <sup>-74</sup>  | 1                               | Alcohol dehydrogenase, putative [ <i>Ricinus communis</i> , XP_002525379]                     |

| Sequence ID <sup>(i)</sup> | Size (bp) | Accession n <sup>o</sup> <sup>(ii)</sup> | E-value              | Redundancy (from 979 sequences) | Gene Identification                                                                                |
|----------------------------|-----------|------------------------------------------|----------------------|---------------------------------|----------------------------------------------------------------------------------------------------|
| SSH24-7-G10                | 269       | Already registered                       | $3 \times 10^{-134}$ | 2                               | Dcarg-1 [ <i>Daucus carota</i> , AB027501]                                                         |
| SSH24-9-G4                 | 794       | Already registered                       | 0.0                  | 16                              | Pathogenesis-related protein-like protein 1 [ <i>Daucus carota</i> , AB082377]                     |
| SSH24-1-A11                | 207       | IN PROCESS                               | $2 \times 10^{-14}$  | 12                              | Protease inhibitor 2 [ <i>Zinnia elegans</i> , AB091074]                                           |
| SSH24-9-G1                 | 544       | Already registered                       | 0.0                  | 4                               | Short chain alcohol dehydrogenase-like [ <i>Daucus carota</i> , AB104856]                          |
| SSH24-2-F2                 | 389       | IN PROCESS                               | $1 \times 10^{-12}$  | 1                               | [ <i>Populus trichocarpa</i> , XM_002303561]                                                       |
| SSH24-9-A9                 | 386       | IN PROCESS                               | $4 \times 10^{-51}$  | 1                               | Chitinase III [ <i>Vitis vinifera</i> , AB105374]                                                  |
| SSH24-8-F4                 | 593       | Already registered                       | 0.0                  | 41                              | CAPSE mRNA for cell attachment protein in somatic embryogenesis [ <i>Daucus carota</i> , AB104856] |
| SSH24-8-E9                 | 341       | Already registered                       | $7 \times 10^{-168}$ | 9                               | Pathogenesis-related protein-like protein 1 [ <i>Daucus carota</i> , AB127984]                     |
| SSH24-11-A11               | 598       | IN PROCESS                               | 0.0                  | 3                               | Chitinase precursor [ <i>Petroselinum crispum</i> , AF141374]                                      |
| SSH24-5-C6                 | 276       | IN PROCESS                               | $2 \times 10^{-10}$  | 1                               | Synthetic construct major pollen allergen Artv1 [Synthetic construct, AF502559]                    |
| SSH24-5-E4                 | 343       | IN PROCESS                               | $9 \times 10^{-34}$  | 2                               | Polygalacturonase-inhibiting protein, putative [ <i>Rubus idaeus</i> , AJ620354]                   |
| SSH24-10-A10               | 699       | IN PROCESS                               | $2 \times 10^{-40}$  | 2                               | Alcohol dehydrogenase [ <i>Solanum tuberosum</i> , X92179]                                         |
| SSH24-4-E12                | 505       | IN PROCESS                               | $8 \times 10^{-18}$  | 1                               | Polyphenol oxidase [ <i>Vitis vinifera</i> , XM_002276076]                                         |
| SSH24-1-A3-1               | 288       | IN PROCESS                               | $1 \times 10^{-24}$  | 2                               | Monoxygenase, putative [ <i>Solanum tuberosum</i> , AB061259]                                      |
| SSH24-4-H3                 | 421       | IN PROCESS                               | $4 \times 10^{-45}$  | 2                               | Heterogeneous nuclear ribonucleoprotein 27C [ <i>Ricinus communis</i> , XM_002528331]              |
| SSH24-1-B10                | 694       | Already registered                       | 0.0                  | 31                              | Extracellular dermal glycoprotein [ <i>Daucus carota</i> , D14550]                                 |
| SSH24-11-D1                | 269       | IN PROCESS                               | $2 \times 10^{-53}$  | 1                               | Polyphenol oxidase [ <i>Camellia nitidissima</i> , FJ597757]                                       |
| SSH24-10-G4                | 217       | IN PROCESS                               | $7 \times 10^{-39}$  | 8                               | 2-alkenal reductase [ <i>Artemisia annua</i> , FJ750460]                                           |
| SSH24-11-E2                | 848       | IN PROCESS                               | $6 \times 10^{-111}$ | 6                               | Polyphenol oxidase [ <i>Taraxacum officinale</i> , FM178478]                                       |
| SSH24-9-F10                | 668       | Already registered                       | 0.0                  | 7                               | Secreted protein (EP4b) [ <i>Daucus carota</i> , L36957]                                           |

| Sequence ID <sup>(i)</sup> | Size (bp) | Accession n <sup>o</sup> <sup>(ii)</sup> | E-value              | Redundancy (from 979 sequences) | Gene Identification                                                                               |
|----------------------------|-----------|------------------------------------------|----------------------|---------------------------------|---------------------------------------------------------------------------------------------------|
| SSH24-4-F6                 | 246       | Already registered                       | $2 \times 10^{-96}$  | 1                               | Class IV chitinase EP3-3/E7 (EP3) [ <i>Daucus carota</i> , U52847]                                |
| SSH24-1-A1                 | 343       | IN PROCESS                               | $2 \times 10^{-112}$ | 3                               | Pathogenesis-related protein type B [ <i>Petroselinum crispum</i> , X12573]                       |
| SSH24-9-G9                 | 535       | IN PROCESS                               | $6 \times 10^{-165}$ | 4                               | Pathogenesis-related protein type A [ <i>Petroselinum crispum</i> , X12574]                       |
| SSH24-2-C11                | 716       | IN PROCESS                               | 0.0                  | 3                               | Pathogenesis-related protein 2 [ <i>Petroselinum crispum</i> , X58698]                            |
| SSH24-4-E2                 | 335       | IN PROCESS                               | $1 \times 10^{-32}$  | 1                               | Chitinase, putative [ <i>Vitis vinifera</i> , XM_002270543]                                       |
| SSH24-8-G8                 | 174       | IN PROCESS                               | $2 \times 10^{-31}$  | 1                               | Alcohol dehydrogenase, putative [ <i>Vitis vinifera</i> , XM_002279390]                           |
| SSH24-9-C6                 | 584       | IN PROCESS                               | $3 \times 10^{-144}$ | 2                               | Heat shock 70 kDa protein, putative [ <i>Ricinus communis</i> , XM_002528153]                     |
| SSH24-4-F3                 | 277       | IN PROCESS                               | $2 \times 10^{-48}$  | 1                               | Pectinesterase, putative [ <i>Vitis vinifera</i> , XM_002280410]                                  |
| SSH24-4-E4                 | 711       | IN PROCESS                               | $8 \times 10^{-140}$ | 1                               | Pectinesterase, putative [ <i>Vitis vinifera</i> , XM_002282242]                                  |
| SSH24-7-E4                 | 675       | IN PROCESS                               | $2 \times 10^{-65}$  | 1                               | Heat shock transcription factor, putative [ <i>Vitis vinifera</i> , XM_002284180]                 |
| SSH24-9-C4                 | 545       | IN PROCESS                               | $4 \times 10^{-79}$  | 3                               | MtN19-like protein [ <i>Vitis vinifera</i> , XM_002284703]                                        |
| SSH24-11-G4                | 634       | IN PROCESS                               | $5 \times 10^{-180}$ | 2                               | Sulfite reductase, putative [ <i>Vitis vinifera</i> , XM_002285362]                               |
| SSH24-5-H12                | 806       | IN PROCESS                               | $2 \times 10^{-63}$  | 1                               | Heat shock transcription factor, putative [ <i>Populus trichocarpa</i> , XM_002307987]            |
| SSH24-11-F8                | 257       | IN PROCESS                               | $6 \times 10^{-41}$  | 1                               | Glucan endo-1,3-beta-glucosidase precursor, putative [ <i>Populus trichocarpa</i> , XM_002312061] |
| SSH24-2-E8                 | 564       | IN PROCESS                               | $6 \times 10^{-153}$ | 1                               | Pectinesterase-2 precursor, putative [ <i>Populus trichocarpa</i> , XM_002322365]                 |
| SSH24-10-E11               | 510       | IN PROCESS                               | $4 \times 10^{-47}$  | 6                               | Polygalacturonase inhibitor [ <i>Actinidia deliciosa</i> , Z49063]                                |
| SSH24-9-D4                 | 281       | IN PROCESS                               | $1 \times 10^{-31}$  | 12                              | Mutt/nudix hydrolase, putative [ <i>Ricinus communis</i> , XM_002524337]                          |
| SSH24-1-B9                 | 332       | IN PROCESS                               | $1 \times 10^{-38}$  | 3                               | Hevamine-A precursor, putative [ <i>Ricinus communis</i> , XM_002513566]                          |
| SSH24-5-C5                 | 361       | IN PROCESS                               | $6 \times 10^{-24}$  | 4                               | Potato inhibitor I, putative [ <i>Populus trichocarpa</i> , XM_002334086]                         |
| SSH24-5-D11                | 340       | IN PROCESS                               | $4 \times 10^{-76}$  | 10                              | 2-alkenal reductase, putative [ <i>Populus trichocarpa</i> , XM_002331617]                        |

| Sequence ID <sup>(i)</sup> | Size (bp) | Accession n <sup>o</sup> <sup>(ii)</sup> | E-value              | Redundancy (from 979 sequences) | Gene Identification                                                                        |
|----------------------------|-----------|------------------------------------------|----------------------|---------------------------------|--------------------------------------------------------------------------------------------|
| SSH24-1-E4                 | 542       | IN PROCESS                               | $6 \times 10^{-83}$  | 1                               | Heat shock factor, putative [ <i>Populus trichocarpa</i> , XM_002323284]                   |
| SSH24-9-B10                | 437       | IN PROCESS                               | $2 \times 10^{-47}$  | 3                               | Zn-dependent alcohol dehydrogenases, putative [ <i>Populus trichocarpa</i> , XM_002324658] |
| SSH24-4-C2                 | 600       | IN PROCESS                               | 0.0                  | 1                               | Major allergen Dau c 1/1 [ <i>Daucus carota</i> , Z84376]                                  |
| SSH24-10-D2                | 272       | IN PROCESS                               | $2 \times 10^{-02}$  | 3                               | Alcohol dehydrogenase [ <i>Vitis vinifera</i> , XM_002281229]                              |
| SSH24-10-H8                | 299       | IN PROCESS                               | $2 \times 10^{-21}$  | 1                               | Protease inhibitor, putative [ <i>Populus trichocarpa</i> , XM_002334086]                  |
| SSH24-1-D6                 | 301       | IN PROCESS                               | $4 \times 10^{-12}$  | 5                               | Miraculin homologue, putative [ <i>Youngia japonica</i> , AB023648]                        |
| SSH24-2-H10                | 320       | IN PROCESS                               | $5 \times 10^{-11}$  | 2                               | Patatin-like protein 3 [ <i>Nicotiana tabacum</i> , AF158253]                              |
| SSH24-2-A12                | 501       | IN PROCESS                               | $1 \times 10^{-02}$  | 2                               | Kunitz trypsin inhibitor [ <i>Nicotiana tabacum</i> , FJ494920]                            |
| SSH24-9-E12                | 415       | IN PROCESS                               | $2 \times 10^{-17}$  | 1                               | Light-inducible protein atls1, putative [ <i>Ricinus communis</i> , XM_002526640]          |
| SSH24-5-B12                | 826       | IN PROCESS                               | $6 \times 10^{-180}$ | 1                               | Lysine histidine transporter 1, putative [ <i>Vitis vinifera</i> , XM_002265272]           |
| SSH24-5-H8                 | 633       | Already registered                       | $1 \times 10^{-36}$  | 1                               | P40-like protein [ <i>Daucus carota</i> , AB012702]                                        |
| SSH24-8-C4                 | 359       | Already registered                       | $1 \times 10^{-178}$ | 1                               | NADP specific isocitrate dehydrogenase [ <i>Daucus carota</i> , AB019327]                  |
| SSH24-5-F2                 | 505       | IN PROCESS                               | $2 \times 10^{-125}$ | 1                               | Nucleoside diphosphate kinase 1 [ <i>Codonopsis lanceolata</i> , AB126060]                 |
| SSH24-9-H1                 | 269       | IN PROCESS                               | $1 \times 10^{-44}$  | 2                               | WAKL1 gene [ <i>Nicotiana tabacum</i> , AB291545]                                          |
| SSH24-2-H12                | 241       | IN PROCESS                               | $1 \times 10^{-67}$  | 1                               | Serine hydroxymethyltransferase 1 [ <i>Glycine max</i> , EU912419]                         |
| SSH24-7-B6                 | 557       | IN PROCESS                               | $5 \times 10^{-109}$ | 1                               | RNA binding protein, putative [ <i>Nicotiana tabacum</i> , AF029351]                       |
| SSH24-7-G6                 | 488       | IN PROCESS                               | 0.0                  | 1                               | Acyl carrier protein [ <i>Daucus carota</i> , AF083950]                                    |
| SSH24-7-G8                 | 524       | Already registered                       | 0.0                  | 2                               | Poly(A)-binding protein [ <i>Daucus carota</i> , AF349964.1]                               |
| SSH24-4-C5                 | 505       | IN PROCESS                               | $5 \times 10^{-77}$  | 1                               | Adenosine 5'-phosphosulfate reductase [ <i>Glycine max</i> , AF452450]                     |
| SSH24-3-C2                 | 102       | IN PROCESS                               | $2 \times 10^{-16}$  | 1                               | Monoxygenase, putative [ <i>Arabidopsis thaliana</i> , AK227657]                           |

| Sequence ID <sup>(i)</sup> | Size (bp) | Accession n <sup>o</sup> <sup>(ii)</sup> | E-value              | Redundancy (from 979 secuencias) | Gene Identification                                                                                        |
|----------------------------|-----------|------------------------------------------|----------------------|----------------------------------|------------------------------------------------------------------------------------------------------------|
| SSH24-3-F7                 | 202       | IN PROCESS                               | $6 \times 10^{-14}$  | 3                                | Glutathione-s-transferase omega, putative [ <i>Ricinus communis</i> , XM_002525158]                        |
| SSH24-1-C11                | 550       | IN PROCESS                               | $5 \times 10^{-103}$ | 1                                | Cysteine hydrolase, putative [ <i>Vitis vinifera</i> , XM_002270860]                                       |
| SSH24-3-F11                | 329       | IN PROCESS                               | $3 \times 10^{-78}$  | 1                                | Serine/threonine protein kinase, putative [ <i>Ricinus communis</i> , XM_002523507]                        |
| SSH24-6-G2                 | 211       | IN PROCESS                               | $2 \times 10^{-59}$  | 3                                | Serine/threonine protein phosphatase, putative [ <i>Arabidopsis thaliana</i> , NM_103920.3]                |
| SSH24-8-B7                 | 576       | IN PROCESS                               | $1 \times 10^{-41}$  | 1                                | Glucose-methanol-choline oxidoreductase, putative [ <i>Ricinus communis</i> , XM_002527358]                |
| SSH24-8-D9                 | 275       | IN PROCESS                               | $2 \times 10^{-34}$  | 1                                | Membrane transport protein, putative [ <i>Populus trichocarpa</i> , XM_002301858]                          |
| SSH24-1-H8                 | 240       | IN PROCESS                               | $6 \times 10^{-34}$  | 1                                | Ribosome-associated protein p40-like [ <i>Solanum tuberosum</i> , DQ207864]                                |
| SSH24-9-C12                | 530       | IN PROCESS                               | $1 \times 10^{-97}$  | 3                                | Peroxisomal membrane protein 2, pxmp2, putative [ <i>Ricinus communis</i> , XM_002518406]                  |
| SSH24-1-A3                 | 168       | IN PROCESS                               | $7 \times 10^{-25}$  | 2                                | 60S ribosomal protein L21-like protein [ <i>Solanum tuberosum</i> , DQ191668]                              |
| SSH24-11-H10               | 272       | IN PROCESS                               | $1 \times 10^{-37}$  | 1                                | Protein phosphatase 2c, putative [ <i>Ricinus communis</i> , XM_002534061]                                 |
| SSH24-11-G5                | 472       | IN PROCESS                               | $1 \times 10^{-57}$  | 1                                | S-locus-specific glycoprotein precursor, putative [ <i>Ricinus communis</i> , XM_002525833]                |
| SSH24-2-B5                 | 604       | IN PROCESS                               | $2 \times 10^{-39}$  | 1                                | Kinase, putative [ <i>Vitis vinifera</i> , XM_002277295]                                                   |
| SSH24-7-B4                 | 289       | IN PROCESS                               | $6 \times 10^{-54}$  | 1                                | UDP-glucose 4-epimerase [ <i>Solanum lycopersicum</i> , AY197749]                                          |
| SSH24-3-F8                 | 286       | IN PROCESS                               | $1 \times 10^{-125}$ | 1                                | Variable lymphocyte receptor (VLR) [ <i>Petromyzon marinus</i> , AY577941]                                 |
| SSH24-10-F7                | 473       | Already registered                       | 0.0                  | 1                                | Ribosomal protein S7 (rps7) and cytochrome oxidase subunit 1-2 [ <i>Daucus carota</i> , AY820131]          |
| SSH24-10-B10               | 221       | IN PROCESS                               | $1 \times 10^{-55}$  | 1                                | 40S ribosomal protein S3, putative [ <i>Ricinus communis</i> , XM_002514015]                               |
| SSH24-2-H6                 | 287       | IN PROCESS                               | $2 \times 10^{-73}$  | 1                                | GTP cyclohydrolase II/3,4-dihydroxy-2-butanone 4-phosphate synthase [ <i>Malus x domestica</i> , AF403706] |
| SSH24-4-E9                 | 280       | IN PROCESS                               | $3 \times 10^{-71}$  | 2                                | Ribosomal_L7Ae protein, putative [ <i>Vitis vinifera</i> , XM_002281001]                                   |
|                            |           |                                          |                      |                                  |                                                                                                            |

| Sequence ID <sup>(i)</sup> | Size (bp) | Accession n <sup>o</sup> <sup>(ii)</sup> | E-value              | Redundancy (from 979 sequences) | Gene Identification                                                                        |
|----------------------------|-----------|------------------------------------------|----------------------|---------------------------------|--------------------------------------------------------------------------------------------|
| SSH24-2-E3                 | 447       | IN PROCESS                               | $3 \times 10^{-41}$  | 1                               | Amino acid transporter, putative [ <i>Ricinus communis</i> , XM_002528370]                 |
| SSH24-7-C8                 | 198       | IN PROCESS                               | $6 \times 10^{-36}$  | 1                               | 60S ribosomal protein L13a, putative [ <i>Zea mays</i> , NM_001137336]                     |
| SSH24-2-E2                 | 326       | IN PROCESS                               | $1 \times 10^{-18}$  | 1                               | Cytochrome P450, putative [ <i>Glycine max</i> , Y10493]                                   |
| SSH24-11-F12               | 983       | Already registered                       | 0.0                  | 1                               | Elongation factor 1-alpha [ <i>Daucus carota</i> , D12709]                                 |
| SSH24-3-B5                 | 515       | IN PROCESS                               | $5 \times 10^{-160}$ | 1                               | Aconitase [ <i>Cucurbita cv. Kurokawa Amakuri</i> , D29629]                                |
| SSH24-9-F6                 | 709       | IN PROCESS                               | $2 \times 10^{-84}$  | 1                               | Cytochrome P450 monooxygenase [ <i>Petunia x hybrida</i> , DQ099541]                       |
| SSH24-4-B5                 | 419       | IN PROCESS                               | $6 \times 10^{-75}$  | 1                               | 60S ribosomal protein, putative [ <i>Solanum tuberosum</i> , DQ294270]                     |
| SSH24-3-F9                 | 148       | IN PROCESS                               | $6 \times 10^{-69}$  | 1                               | 26S ribosomal RNA [ <i>Panax ginseng</i> , GQ178085]                                       |
| SSH24-7-F8                 | 446       | IN PROCESS                               | $1 \times 10^{-109}$ | 1                               | 60S ribosomal protein L13A [ <i>Arabidopsis thaliana</i> , NM_111591]                      |
| SSH24-4-D6                 | 613       | IN PROCESS                               | $5 \times 10^{-40}$  | 1                               | Epoxide hydrolase [ <i>Solanum tuberosum</i> , U02494]                                     |
| SSH24-6-E10                | 172       | IN PROCESS                               | $3 \times 10^{-54}$  | 1                               | Ribosomal protein, putative [ <i>Daucus carota</i> , U47095]                               |
| SSH24-4-H1                 | 787       | IN PROCESS                               | $2 \times 10^{-167}$ | 1                               | 60S ribosomal protein [ <i>Vitis vinifera</i> , XM_002262661]                              |
| SSH24-6-E7                 | 480       | IN PROCESS                               | $2 \times 10^{-37}$  | 1                               | Patatin, putative [ <i>Vitis vinifera</i> , XM_002262906]                                  |
| SSH24-9-B8                 | 294       | IN PROCESS                               | $2 \times 10^{-34}$  | 1                               | AMP dependent ligase, putative [ <i>Vitis vinifera</i> , XM_002263765]                     |
| SSH24-1-B8                 | 240       | IN PROCESS                               | $4 \times 10^{-30}$  | 1                               | AMP dependent ligase, putative [ <i>Ricinus communis</i> , XM_002521697]                   |
| SSH24-2-G9                 | 547       | IN PROCESS                               | $1 \times 10^{-141}$ | 1                               | Inosine-5'-monophosphate dehydrogenase, putative [ <i>Vitis vinifera</i> , XM_002265010]   |
| SSH24-10-G12               | 440       | IN PROCESS                               | $2 \times 10^{-110}$ | 1                               | Stearoyl-acyl-carrier protein desaturase, putative [ <i>Vitis vinifera</i> , XM_002265150] |
| SSH24-6-C7                 | 782       | IN PROCESS                               | $8 \times 10^{-128}$ | 1                               | Lysine histidine transporter 1, putative [ <i>Vitis vinifera</i> , XM_002265272]           |
| SSH24-9-E3                 | 406       | IN PROCESS                               | $2 \times 10^{-30}$  | 2                               | Fatty acid hydroxylase, putative [ <i>Vitis vinifera</i> , XM_002265649]                   |
| SSH24-7-E6                 | 547       | IN PROCESS                               | $3 \times 10^{-74}$  | 6                               | Aldo/keto reductase, putative [ <i>Vitis vinifera</i> , XM_002265891]                      |
| SSH24-2-D9                 | 379       | IN PROCESS                               | $1 \times 10^{-89}$  | 1                               | Aldo/keto reductase, putative [ <i>Vitis vinifera</i> , XM_002266241]                      |
| SSH24-10-D1                | 538       | IN PROCESS                               | $3 \times 10^{-24}$  | 1                               | Zinc finger protein, putative [ <i>Ricinus communis</i> , XM_002522244]                    |
|                            |           |                                          |                      |                                 |                                                                                            |



| Sequence ID <sup>(i)</sup> | Size (bp) | Accession n <sup>o</sup> <sup>(ii)</sup> | E-value                | Redundancy (from 979 sequences) | Gene Identification                                                                                     |
|----------------------------|-----------|------------------------------------------|------------------------|---------------------------------|---------------------------------------------------------------------------------------------------------|
| SSH24-5-E3                 | 521       | IN PROCESS                               | 1 x 10 <sup>-16</sup>  | 1                               | Zinc finger protein, putative [ <i>Ricinus communis</i> , XM_002533195]                                 |
| SSH24-4-C3                 | 483       | IN PROCESS                               | 2 x 10 <sup>-144</sup> | 1                               | Caseinolytic protease, putative [ <i>Vitis vinifera</i> , XM_002266344]                                 |
| SSH24-4-D2                 | 450       | IN PROCESS                               | 8 x 10 <sup>-155</sup> | 1                               | 60S ribosomal protein L13a protein [ <i>Vitis vinifera</i> , XM_002267455]                              |
| SSH24-2-G11                | 453       | IN PROCESS                               | 5 x 10 <sup>-70</sup>  | 1                               | Serine/threonine protein kinase, putative [ <i>Vitis vinifera</i> , XM_002267636]                       |
| SSH24-9-D6                 | 262       | IN PROCESS                               | 1 x 10 <sup>-62</sup>  | 1                               | Radical sam protein, putative [ <i>Vitis vinifera</i> , XM_002268256]                                   |
| SSH24-8-F10                | 269       | IN PROCESS                               | 1 x 10 <sup>-44</sup>  | 1                               | Ankyrin repeat-containing protein, putative [ <i>Vitis vinifera</i> , XM_002268406]                     |
| SSH24-7-H2                 | 235       | IN PROCESS                               | 1 x 10 <sup>-61</sup>  | 1                               | UDP-glucose 4-epimerase, putative [ <i>Vitis vinifera</i> , XM_002268743]                               |
| SSH24-9-D5                 | 734       | IN PROCESS                               | 1 x 10 <sup>-163</sup> | 1                               | Ubiquinone/menaquinone biosynthesis methyltransferase, putative [ <i>Vitis vinifera</i> , XM_002271722] |
| SSH24-9-H7                 | 289       | IN PROCESS                               | 2 x 10 <sup>-47</sup>  | 3                               | Lipase like [ <i>Vitis vinifera</i> , XM_002271766]                                                     |
| SSH24-8-B11                | 442       | IN PROCESS                               | 3 x 10 <sup>-129</sup> | 1                               | Adenosine kinase [ <i>Vitis vinifera</i> , XM_002272301]                                                |
| SSH24-5-D5                 | 522       | IN PROCESS                               | 2 x 10 <sup>-43</sup>  | 1                               | Monooxygenase, putative [ <i>Ricinus communis</i> , XM_002530028]                                       |
| SSH24-3-B6                 | 307       | IN PROCESS                               | 5 x 10 <sup>-74</sup>  | 1                               | Cwf15/Cwe15 cell cycle control protein [ <i>Vitis vinifera</i> , XM_002272417]                          |
| SSH24-5-D1                 | 326       | IN PROCESS                               | 2 x 10 <sup>-42</sup>  | 1                               | Pollen allerg 1 [ <i>Vitis vinifera</i> , XM_002273860]                                                 |
| SSH24-2-F5                 | 521       | IN PROCESS                               | 2 x 10 <sup>-37</sup>  | 1                               | Short-chain dehydrogenase, putative [ <i>Vitis vinifera</i> , XM_002274896]                             |
| SSH24-10-E4                | 384       | IN PROCESS                               | 1 x 10 <sup>-90</sup>  | 1                               | Transcription factor IWS1, putative [ <i>Vitis vinifera</i> , XM_002276847]                             |
| SSH24-4-C10                | 153       | IN PROCESS                               | 1 x 10 <sup>-21</sup>  | 1                               | Reverse transcriptases, putative [ <i>Vitis vinifera</i> , XM_002277654]                                |
| SSH24-2-F9                 | 389       | IN PROCESS                               | 8 x 10 <sup>-54</sup>  | 1                               | Major facilitator, putative [ <i>Vitis vinifera</i> , XM_002277715]                                     |
| SSH24-11-C11               | 430       | IN PROCESS                               | 2 x 10 <sup>-99</sup>  | 1                               | Glutathione S-transferase [ <i>Vitis vinifera</i> , XM_002277850]                                       |
| SSH24-4-H10                | 427       | IN PROCESS                               | 3 x 10 <sup>-92</sup>  | 1                               | Glycine cleavage system h protein, putative [ <i>Ricinus communis</i> , XM_002528116]                   |
| SSH24-2-C5                 | 498       | IN PROCESS                               | 1 x 10 <sup>-96</sup>  | 1                               | Peroxisomal membrane protein, putative [ <i>Vitis vinifera</i> , XM_002279452]                          |

| Sequence ID <sup>(i)</sup> | Size (bp) | Accession n <sup>o</sup> <sup>(ii)</sup> | E-value                | Redundancy (from 979 sequences) | Gene Identification                                                                             |
|----------------------------|-----------|------------------------------------------|------------------------|---------------------------------|-------------------------------------------------------------------------------------------------|
| SSH24-9-H2                 | 387       | IN PROCESS                               | 2 x 10 <sup>-55</sup>  | 1                               | MATE efflux protein family, putative [ <i>Vitis vinifera</i> , XM_002280387]                    |
| SSH24-3-F6                 | 605       | IN PROCESS                               | 5 x 10 <sup>-21</sup>  | 1                               | MATE efflux protein family, putative [ <i>Vitis vinifera</i> , XM_002265897]                    |
| SSH24-7-E12                | 521       | IN PROCESS                               | 5 x 10 <sup>-122</sup> | 2                               | Nuclear acid binding protein, putative [ <i>Vitis vinifera</i> , XM_002280565]                  |
| SSH24-4-F1                 | 288       | IN PROCESS                               | 1 x 10 <sup>-50</sup>  | 1                               | Serine/Threonine protein kinases, catalytic domain [ <i>Vitis vinifera</i> , XM_002282409]      |
| SSH24-3-B4                 | 182       | IN PROCESS                               | 7 x 10 <sup>-38</sup>  | 1                               | Proteinase kinase, putative [ <i>Vitis vinifera</i> , XM_002282851]                             |
| SSH24-8-H12                | 615       | IN PROCESS                               | 1 x 10 <sup>-98</sup>  | 1                               | Type 1 glutamine amidotransferase (GATase1)-like domain [ <i>Vitis vinifera</i> , XM_002283027] |
| SSH24-4-C11                | 440       | IN PROCESS                               | 7 x 10 <sup>-56</sup>  | 1                               | Glycosyltransferase, putative [ <i>Vitis vinifera</i> , XM_002284345]                           |
| SSH24-6-C1                 | 300       | IN PROCESS                               | 5 x 10 <sup>-43</sup>  | 2                               | 2-polyprenyl-6-methoxyphenol hydroxylase, putative [ <i>Vitis vinifera</i> , XM_002284701]      |
| SSH24-1-E6                 | 694       | IN PROCESS                               | 2 x 10 <sup>-108</sup> | 1                               | NADH pyrophosphatase, putative [ <i>Vitis vinifera</i> , XM_002285033]                          |
| SSH24-7-C1                 | 384       | IN PROCESS                               | 5 x 10 <sup>-76</sup>  | 1                               | Phosphate transporter, putative [ <i>Vitis vinifera</i> , XM_002285117]                         |
| SSH24-1-G3                 | 463       | IN PROCESS                               | 1 x 10 <sup>-147</sup> | 6                               | D-3-phosphoglycerate dehydrogenase, putative [ <i>Vitis vinifera</i> , XM_002285322]            |
| SSH24-6-E1                 | 559       | IN PROCESS                               | 1 x 10 <sup>-54</sup>  | 1                               | Serine/arginine rich splicing factor, putative [ <i>Ricinus communis</i> , XM_002531442]        |
| SSH24-6-H10                | 382       | IN PROCESS                               | 2 x 10 <sup>-73</sup>  | 2                               | Protein binding protein, putative [ <i>Ricinus communis</i> , XM_002518657]                     |
| SSH24-11-H8                | 226       | IN PROCESS                               | 2 x 10 <sup>-46</sup>  | 1                               | Malate dehydrogenase, putative [ <i>Populus trichocarpa</i> , XM_002298765]                     |
| SSH24-2-F8                 | 722       | IN PROCESS                               | 1 x 10 <sup>-155</sup> | 1                               | DnaJ-like protein [ <i>Populus trichocarpa</i> , XM_002301212]                                  |
| SSH24-10-G11               | 171       | IN PROCESS                               | 2 x 10 <sup>-18</sup>  | 1                               | UDP-glucose 4-epimerase [ <i>Populus trichocarpa</i> , XM_002303617]                            |
| SSH24-8-G6                 | 197       | IN PROCESS                               | 2 x 10 <sup>-65</sup>  | 1                               | Asparagine synthase, putative [ <i>Populus trichocarpa</i> , XM_002306274]                      |
| SSH24-10-D10               | 379       | IN PROCESS                               | 3 x 10 <sup>-49</sup>  | 1                               | Syntaxin, putative [ <i>Populus trichocarpa</i> , XM_002308290]                                 |
| SSH24-3-C10                | 328       | IN PROCESS                               | 1 x 10 <sup>-102</sup> | 2                               | Snf7, putative [ <i>Populus trichocarpa</i> , XM_002310962]                                     |

| Sequence ID <sup>(i)</sup> | Size (bp) | Accession n° <sup>(ii)</sup> | E-value              | Redundancy (from 979 sequences) | Gene Identification                                                                                    |
|----------------------------|-----------|------------------------------|----------------------|---------------------------------|--------------------------------------------------------------------------------------------------------|
| SSH24-6-H1                 | 122       | IN PROCESS                   | $2 \times 10^{-22}$  | 1                               | 60S ribosomal protein L13a protein [ <i>Populus trichocarpa</i> , XM_002314563]                        |
| SSH24-5-C10                | 456       | IN PROCESS                   | $1 \times 10^{-71}$  | 1                               | Aldo-keto reductase, putative [ <i>Populus trichocarpa</i> , XM_002321061]                             |
| SSH24-6-E3                 | 240       | IN PROCESS                   | $6 \times 10^{-28}$  | 1                               | Zinc finger protein, putative [ <i>Ricinus communis</i> , XM_002533198]                                |
| SSH24-6-F1                 | 231       | IN PROCESS                   | $1 \times 10^{-61}$  | 1                               | Succinate dehydrogenase, putative [ <i>Ricinus communis</i> , XM_002530436]                            |
| SSH24-5-C10                | 264       | IN PROCESS                   | $4 \times 10^{-49}$  | 1                               | Phosphatidic acid phosphatase, putative [ <i>Ricinus communis</i> , XM_002528028]                      |
| SSH24-2-F6                 | 420       | IN PROCESS                   | $5 \times 10^{-63}$  | 1                               | Alpha/beta hydrolase domain containing protein 1,3, putative [ <i>Ricinus communis</i> , XM_002526802] |
| SSH24-6-D2                 | 313       | IN PROCESS                   | $5 \times 10^{-43}$  | 1                               | Cationic amino acid transporter, putative [ <i>Ricinus communis</i> , XM_002526568]                    |
| SSH24-9-G10                | 303       | IN PROCESS                   | $2 \times 10^{-28}$  | 1                               | 2OG-Fe(II) oxygenase, putative [ <i>Ricinus communis</i> , XM_002524758]                               |
| SSH24-11-H7                | 507       | IN PROCESS                   | $2 \times 10^{-89}$  | 1                               | Cytochrome B5 isoform 1, putative [ <i>Ricinus communis</i> , XM_002521050]                            |
| SSH24-5-A3                 | 325       | IN PROCESS                   | $5 \times 10^{-81}$  | 1                               | Pyruvate dehydrogenase, putative [ <i>Ricinus communis</i> , XM_002519618]                             |
| SSH24-10-H10               | 747       | IN PROCESS                   | 0.0                  | 1                               | Transitional endoplasmic reticulum ATPase, putative                                                    |
| SSH24-3-E12                | 422       | IN PROCESS                   | $1 \times 10^{-38}$  | 2                               | Acyl-CoA thioesterase, putative [ <i>Ricinus communis</i> , XM_002519297]                              |
| SSH24-2-B1                 | 400       | IN PROCESS                   | $3 \times 10^{-98}$  | 2                               | 60S ribosomal protein L13a protein [ <i>Ricinus communis</i> , XM_002518061]                           |
| SSH24-3-E7                 | 647       | IN PROCESS                   | $4 \times 10^{-146}$ | 1                               | 60S ribosomal protein L7, putative [ <i>Ricinus communis</i> , XM_002517470]                           |
| SSH24-1-E2                 | 463       | IN PROCESS                   | $7 \times 10^{-62}$  | 1                               | Serine carboxypeptidase, putative [ <i>Ricinus communis</i> , XM_002517243]                            |
| SSH24-8-G10                | 368       | IN PROCESS                   | $2 \times 10^{-99}$  | 2                               | Chaperone protein dnaJ, putative [ <i>Ricinus communis</i> , XM_002514373]                             |
| SSH24-3-G4                 | 858       | IN PROCESS                   | 0.0                  | 2                               | Calnexin, putative [ <i>Ricinus communis</i> , XM_002511020]                                           |
| SSH24-7-B1                 | 283       | IN PROCESS                   | $1 \times 10^{-17}$  | 1                               | Salutaridinol 7-O-acetyltransferase, putative [ <i>Ricinus communis</i> , XM_002510620]                |
|                            |           |                              |                      |                                 |                                                                                                        |

| Sequence ID <sup>(i)</sup>         | Size (bp) | Accession n <sup>o</sup> <sup>(ii)</sup> | E-value                | Redundancy (from 979 sequences) | Gene Identification                                                                            |
|------------------------------------|-----------|------------------------------------------|------------------------|---------------------------------|------------------------------------------------------------------------------------------------|
| SSH24-6-D6                         | 142       | IN PROCESS                               | 2 x 10 <sup>-18</sup>  | 1                               | MAPEG-like protein [ <i>Sorghum bicolor</i> , XM_002463967]                                    |
| SSH24-5-H2                         | 288       | IN PROCESS                               | 2 x 10 <sup>-35</sup>  | 1                               | RING-finger protein, putative [ <i>Populus trichocarpa</i> , XM_002336479]                     |
| SSH24-2-E1                         | 496       | IN PROCESS                               | 4 x 10 <sup>-103</sup> | 1                               | Adenylyl-sulfate reductase, putative [ <i>Populus trichocarpa</i> , XM_002332674]              |
| SSH24-11-B2                        | 328       | IN PROCESS                               | 3 x 10 <sup>-102</sup> | 1                               | 60S ribosomal protein L13a protein, putative [ <i>Populus trichocarpa</i> , XM_002324016]      |
| SSH24-7-B2                         | 242       | IN PROCESS                               | 4 x 10 <sup>-61</sup>  | 4                               | Major pollen allergen Ory s 1 precursor, putative [ <i>Populus trichocarpa</i> , XM_002326637] |
| SSH24-7-D1                         | 371       | IN PROCESS                               | 5 x 10 <sup>-82</sup>  | 1                               | Protein translocase, putative [ <i>Populus trichocarpa</i> , XM_002331008]                     |
| SSH24-3-C8                         | 400       | IN PROCESS                               | 6 x 10 <sup>-81</sup>  | 3                               | Elongation factor 1 gamma, putative [ <i>Populus trichocarpa</i> , XM_002325493]               |
| SSH24-4-B3                         | 175       | IN PROCESS                               | 5 x 10 <sup>-14</sup>  | 1                               | Transferase, putative [ <i>Populus trichocarpa</i> , XM_002325418]                             |
| SSH24-6-F8                         | 310       | IN PROCESS                               | 1 x 10 <sup>-18</sup>  | 1                               | NADP-dependent oxidoreductases, putative [ <i>Vitis vinifera</i> , XM_002279323]               |
| SSH24-6-A6                         | 743       | IN PROCESS                               | 5 x 10 <sup>-16</sup>  | 3                               | Histone deacetylase [ <i>Populus trichocarpa</i> , XM_002328042]                               |
| SSH24-8-H10                        | 742       | IN PROCESS                               | 6 x 10 <sup>-34</sup>  | 1                               | Cytochrome P450 [ <i>Vitis vinifera</i> , XM_002263573]                                        |
| SSH24-2-H11                        | 711       | IN PROCESS                               | 8 x 10 <sup>-70</sup>  | 1                               | Serine hydroxymethyltransferase 1 [ <i>Glycine max</i> , EU912419]                             |
| SSH24-7-B10                        | 511       | IN PROCESS                               | 2 x 10 <sup>-26</sup>  | 1                               | ADP ribosylating enzyme, putative [ <i>Populus trichocarpa</i> , XM_002303403]                 |
| SSH24-7-H7                         | 496       | IN PROCESS                               | 2 x 10 <sup>-37</sup>  | 1                               | Serine/Threonine protein kinases, putative [ <i>Vitis vinifera</i> , XM_002274189]             |
| SSH24-11-H3                        | 491       | IN PROCESS                               | 6 x 10 <sup>-13</sup>  | 1                               | Oligonucleotide binding protein, putative [ <i>Vitis vinifera</i> , XM_002282211]              |
| SSH24-6-A5                         | 388       | IN PROCESS                               | 5 x 10 <sup>-12</sup>  | 1                               | Lipase, putative [ <i>Populus trichocarpa</i> , XM_002312776]                                  |
| <b>Unidentified function genes</b> |           |                                          |                        |                                 |                                                                                                |
| SSH24-6-B9                         | 392       | IN PROCESS                               | 5 x 10 <sup>-25</sup>  | 2                               | Unknown [ <i>Solanum lycopersicum</i> , AK247113]                                              |
| SSH24-2-G1                         | 125       | IN PROCESS                               | 4 x 10 <sup>-19</sup>  | 1                               | Unknown [ <i>Solanum lycopersicum</i> , AK321416]                                              |
| SSH24-6-A7                         | 184       | IN PROCESS                               | 8 x 10 <sup>-56</sup>  | 1                               | Unknown [ <i>Solanum lycopersicum</i> , AK323989]                                              |
| SSH24-4-B4                         | 253       | IN PROCESS                               | 4 x 10 <sup>-49</sup>  | 2                               | Unknown [ <i>Oryza sativa</i> , CT830536]                                                      |
| SSH24-4-C6                         | 479       | IN PROCESS                               | 2 x 10 <sup>-57</sup>  | 4                               | Unknown [ <i>Vitis vinifera</i> , XM_002285205]                                                |
|                                    |           |                                          |                        |                                 |                                                                                                |

| Sequence ID <sup>(i)</sup> | Size (bp) | Accession n <sup>o</sup> <sup>(ii)</sup> | E-value              | Redundancy (from 979 sequences) | Gene Identification                                  |
|----------------------------|-----------|------------------------------------------|----------------------|---------------------------------|------------------------------------------------------|
| SSH24-8-H3                 | 215       | IN PROCESS                               | $2 \times 10^{-53}$  | 1                               | Unknown [ <i>Populus trichocarpa</i> , XM_002315255] |
| SSH24-11-G7                | 338       | IN PROCESS                               | $3 \times 10^{-79}$  | 1                               | Unknown [ <i>Populus trichocarpa</i> , XM_002324279] |
| SSH24-5-E9                 | 330       | IN PROCESS                               | $8 \times 10^{-105}$ | 1                               | Unknown [ <i>Daucus carota</i> , BI452005]           |
| SSH24-3-C6                 | 263       | IN PROCESS                               | $2 \times 10^{-53}$  | 2                               | Unknown [ <i>Vitis vinifera</i> , XM_002264579]      |
| <b>Novel genes</b>         |           |                                          |                      |                                 |                                                      |
| SSH24-2-A3                 | 72        | IN PROCESS                               |                      | 1                               | Unknown                                              |
| SSH24-7-D3                 | 93        | IN PROCESS                               |                      | 1                               | Unknown                                              |
| SSH24-2-F10                | 118       | IN PROCESS                               |                      | 1                               | Unknown                                              |
| SSH24-1-E7                 | 122       | IN PROCESS                               |                      | 1                               | Unknown                                              |
| SSH24-2-A4                 | 122       | IN PROCESS                               |                      | 1                               | Unknown                                              |
| SSH24-1-G8                 | 133       | IN PROCESS                               |                      | 1                               | Unknown                                              |
| SSH24-8-H5                 | 141       | IN PROCESS                               |                      | 1                               | Unknown                                              |
| SSH24-3-C12                | 150       | IN PROCESS                               |                      | 1                               | Unknown                                              |
| SSH24-2-C10                | 153       | IN PROCESS                               |                      | 1                               | Unknown                                              |
| SSH24-2-D2                 | 164       | IN PROCESS                               |                      | 2                               | Unknown                                              |
| SSH24-2-B7                 | 178       | IN PROCESS                               |                      | 1                               | Unknown                                              |
| SSH24-7-B7                 | 179       | IN PROCESS                               |                      | 1                               | Unknown                                              |
| SSH24-4-G3                 | 188       | IN PROCESS                               |                      | 1                               | Unknown                                              |
| SSH24-9-E11                | 191       | IN PROCESS                               |                      | 1                               | Unknown                                              |
| SSH24-5-A2                 | 201       | IN PROCESS                               |                      | 1                               | Unknown                                              |
| SSH24-9-G6                 | 210       | IN PROCESS                               |                      | 1                               | Unknown                                              |
| SSH24-4-A10                | 314       | IN PROCESS                               |                      | 2                               | Unknown                                              |
| SSH24-3-C3                 | 218       | IN PROCESS                               |                      | 1                               | Unknown                                              |
| SSH24-10-G9                | 223       | IN PROCESS                               |                      | 1                               | Unknown                                              |
| SSH24-11-B6                | 234       | IN PROCESS                               |                      | 2                               | Unknown                                              |
| SSH24-2-H8                 | 236       | IN PROCESS                               |                      | 1                               | Unknown                                              |
| SSH24-1-H2                 | 253       | IN PROCESS                               |                      | 1                               | Unknown                                              |
| SSH24-7-E7                 | 254       | IN PROCESS                               |                      | 1                               | Unknown                                              |
| SSH24-10-A12               | 254       | IN PROCESS                               |                      | 1                               | Unknown                                              |
| SSH24-5-C9                 | 257       | IN PROCESS                               |                      | 1                               | Unknown                                              |
| SSH24-8-G1                 | 265       | IN PROCESS                               |                      | 1                               | Unknown                                              |
| SSH24-5-A5                 | 276       | IN PROCESS                               |                      | 1                               | Unknown                                              |
| SSH24-11-F7                | 276       | IN PROCESS                               |                      | 1                               | Unknown                                              |
| SSH24-4-G8                 | 277       | IN PROCESS                               |                      | 2                               | Unknown                                              |
| SSH24-1-E10                | 279       | IN PROCESS                               |                      | 1                               | Unknown                                              |
| SSH24-8-G3                 | 281       | IN PROCESS                               |                      | 1                               | Unknown                                              |
| SSH24-2-B11                | 282       | IN PROCESS                               |                      | 1                               | Unknown                                              |
| SSH24-10-B2                | 282       | IN PROCESS                               |                      | 1                               | Unknown                                              |
|                            |           |                                          |                      |                                 |                                                      |

| <b>Sequence ID <sup>(i)</sup></b> | <b>Size (bp)</b> | <b>Accession n<sup>o</sup> <sup>(ii)</sup></b> | <b>E-value</b> | <b>Redundancy (from 979 sequences)</b> | <b>Gene Identification</b> |
|-----------------------------------|------------------|------------------------------------------------|----------------|----------------------------------------|----------------------------|
| SSH24-9-D2                        | 284              | IN PROCESS                                     |                | 1                                      | Unknown                    |
| SSH24-9-B7                        | 286              | IN PROCESS                                     |                | 1                                      | Unknown                    |
| SSH24-3-B7                        | 293              | IN PROCESS                                     |                | 1                                      | Unknown                    |
| SSH24-6-D11                       | 314              | IN PROCESS                                     |                | 1                                      | Unknown                    |
| SSH24-6-C10                       | 318              | IN PROCESS                                     |                | 1                                      | Unknown                    |
| SSH24-7-A5                        | 320              | IN PROCESS                                     |                | 1                                      | Unknown                    |
| SSH24-9-E8                        | 320              | IN PROCESS                                     |                | 2                                      | Unknown                    |
| SSH24-9-F2                        | 316              | IN PROCESS                                     |                | 1                                      | Unknown                    |
| SSH24-6-G7                        | 323              | IN PROCESS                                     |                | 1                                      | Unknown                    |
| SSH24-7-E5                        | 323              | IN PROCESS                                     |                | 1                                      | Unknown                    |
| SSH24-7-F9                        | 326              | IN PROCESS                                     |                | 1                                      | Unknown                    |
| SSH24-1-E3                        | 327              | IN PROCESS                                     |                | 1                                      | Unknown                    |
| SSH24-7-A6                        | 329              | IN PROCESS                                     |                | 1                                      | Unknown                    |
| SSH24-10-H11                      | 329              | IN PROCESS                                     |                | 1                                      | Unknown                    |
| SSH24-6-B7                        | 339              | IN PROCESS                                     |                | 1                                      | Unknown                    |
| SSH24-2-D5                        | 368              | IN PROCESS                                     |                | 1                                      | Unknown                    |
| SSH24-4-C12                       | 368              | IN PROCESS                                     |                | 1                                      | Unknown                    |
| SSH24-1-H4                        | 371              | IN PROCESS                                     |                | 1                                      | Unknown                    |
| SSH24-11-G10                      | 371              | IN PROCESS                                     |                | 1                                      | Unknown                    |
| SSH24-11-D5                       | 375              | IN PROCESS                                     |                | 1                                      | Unknown                    |
| SSH24-4-H4                        | 376              | IN PROCESS                                     |                | 2                                      | Unknown                    |
| SSH24-8-F7                        | 380              | IN PROCESS                                     |                | 1                                      | Unknown                    |
| SSH24-9-E2                        | 392              | IN PROCESS                                     |                | 1                                      | Unknown                    |
| SSH24-8-H1                        | 394              | IN PROCESS                                     |                | 1                                      | Unknown                    |
| SSH24-3-B3                        | 400              | IN PROCESS                                     |                | 1                                      | Unknown                    |
| SSH24-10-F1                       | 404              | IN PROCESS                                     |                | 1                                      | Unknown                    |
| SSH24-6-A8                        | 410              | IN PROCESS                                     |                | 1                                      | Unknown                    |
| SSH24-9-E12                       | 415              | IN PROCESS                                     |                | 1                                      | Unknown                    |
| SSH24-8-B5                        | 418              | IN PROCESS                                     |                | 1                                      | Unknown                    |
| SSH24-9-A7                        | 421              | IN PROCESS                                     |                | 1                                      | Unknown                    |
| SSH24-3-E9                        | 424              | IN PROCESS                                     |                | 4                                      | Unknown                    |
| SSH24-11-D12                      | 443              | IN PROCESS                                     |                | 1                                      | Unknown                    |
| SSH24-5-A11                       | 460              | IN PROCESS                                     |                | 1                                      | Unknown                    |
| SSH24-11-A7                       | 460              | IN PROCESS                                     |                | 1                                      | Unknown                    |
| SSH24-6-F5                        | 462              | IN PROCESS                                     |                | 1                                      | Unknown                    |
| SSH24-7-E1                        | 462              | IN PROCESS                                     |                | 2                                      | Unknown                    |
| SSH24-9-G7                        | 483              | IN PROCESS                                     |                | 1                                      | Unknown                    |
| SSH24-11-E8                       | 483              | IN PROCESS                                     |                | 1                                      | Unknown                    |
|                                   |                  |                                                |                |                                        |                            |

| <b>Sequence ID <sup>(i)</sup></b> | <b>Size (bp)</b> | <b>Accession n<sup>o</sup> <sup>(ii)</sup></b> | <b>E-value</b> | <b>Redundancy (from 979 secuencias)</b> | <b>Gene Identification</b> |
|-----------------------------------|------------------|------------------------------------------------|----------------|-----------------------------------------|----------------------------|
| SSH24-1-G4                        | 505              | IN PROCESS                                     |                | 1                                       | Unknown                    |
| SSH24-7-H1                        | 513              | IN PROCESS                                     |                | 1                                       | Unknown                    |
| SSH24-10-F3                       | 517              | IN PROCESS                                     |                | 2                                       | Unknown                    |
| SSH24-10-C12                      | 522              | IN PROCESS                                     |                | 1                                       | Unknown                    |
| SSH24-8-F11                       | 567              | IN PROCESS                                     |                | 1                                       | Unknown                    |
| SSH24-11-E9                       | 584              | IN PROCESS                                     |                | 1                                       | Unknown                    |
| SSH24-3-H1                        | 823              | IN PROCESS                                     |                | 1                                       | Unknown                    |
| SSH24-2-A9                        | 798              | IN PROCESS                                     |                | 1                                       | Unknown                    |
| SSH24-10-D8                       | 139              | IN PROCESS                                     |                | 1                                       | Unknown                    |
| SSH24-3-E6                        | 302              | IN PROCESS                                     |                | 1                                       | Unknown                    |
| SSH24-3-A3                        | 309              | IN PROCESS                                     |                | 1                                       | Unknown                    |
| SSH24-7-G12                       | 314              | IN PROCESS                                     |                | 1                                       | Unknown                    |
| SSH24-2-F12                       | 339              | IN PROCESS                                     |                | 1                                       | Unknown                    |
| SSH24-1-G9                        | 354              | IN PROCESS                                     |                | 12                                      | Unknown                    |
| SSH24-6-E2                        | 511              | IN PROCESS                                     |                | 1                                       | Unknown                    |
| SSH24-7-B3                        | 511              | IN PROCESS                                     |                | 1                                       | Unknown                    |
| SSH24-7-G2                        | 453              | IN PROCESS                                     |                | 1                                       | Unknown                    |
| SSH24-8-B10                       | 433              | IN PROCESS                                     |                | 1                                       | Unknown                    |
| SSH24-9-D11                       | 408              | IN PROCESS                                     |                | 1                                       | Unknown                    |
| SSH24-7-A4                        | 358              | IN PROCESS                                     |                | 1                                       | Unknown                    |
| SSH24-10-C4                       | 358              | IN PROCESS                                     |                | 1                                       | Unknown                    |
| SSH24-2-G5                        | 365              | IN PROCESS                                     |                | 2                                       | Unknown                    |
| SSH24-5-B1                        | 375              | IN PROCESS                                     |                | 1                                       | Unknown                    |

(i) Identification number on the subtractive library.

**Table S6. Sequences of primers used for real-time quantitative reverse transcription PCR (qRT-PCR) analyses.**

| Putative gene identification                                                           | Sequence for forward (F) and reverse (R) primers (5'→3')   |
|----------------------------------------------------------------------------------------|------------------------------------------------------------|
| <b><i>Signaling molecules biosynthesis genes</i></b>                                   |                                                            |
| S-adenosyl-L-methionine synthetase 1 [ <i>Daucus carota</i> , AY583461]                | F: GCAACAACAGGTTTCCTGAAGAC<br>R: TCCCACCTGAGGGGCTTGACTA    |
| 1-aminocyclopropane-1-carboxylate synthase [ <i>Carica papaya</i> , AM113989]          | F: GCTGTTTCTCGCTAATTTGCTG<br>R: ACTGGAAGAAATCGGCATCAAG     |
| Lipoxygenase 2 [ <i>Actinidia deliciosa</i> , DQ497797]                                | F: TTAAGAGGGGAATGGCAGTTGAG<br>R: GTCTTGTAGTAGAAGCCGAGTA    |
| Lipoxygenase 5 [ <i>Actinidia deliciosa</i> , DQ497796]                                | F: CGACCCTGATGGCGTTTACCT<br>R: TCCAATCTGGGATGTCTCGTTGT     |
| 12-oxophytodienoate reductase, putative [ <i>Vitis vinifera</i> , XM_002281083]        | F: GGATGAAAAGTGTAGGAGAGAAG<br>R: CGTAACCCCCAGCAACAATAAA    |
| Omega-6 fatty acid desaturase [ <i>Petroselinum crispum</i> , U86072]                  | F: ACAACTCATCGGAATGGGATTGG<br>R: AGTATCAGTGATGTTATGGAGCACC |
| 3-ketoacyl-CoA thiolase B [ <i>Mangifera indica</i> , X75329]                          | F: CATTAAAGAAGGATGGGACCACA<br>R: GCGGCAAAACTCCTGAATACACC   |
| NADH-ubiquinone oxidoreductase, putative [ <i>Prunus armeniaca</i> , AF139496]         | F: GTGCCAGAAACACTGCCAGAG<br>R: AAGATCAATCCATCCGCCTCAG      |
| Glycolate oxidase, putative [ <i>Vitis vinifera</i> , XM_002278068]                    | F: TGATGGTGAGGCTGGTGTGAGT<br>R: GTGTGATCTCTTTGATTGAGCGG    |
| NADPH oxidase, putative [ <i>Solanum tuberosum</i> , AB198716]                         | F: TGGCATCCTTTTTCTATCACTTCT<br>R: CACTTAGATAATCATCATCTGGG  |
| MnSOD, putative [ <i>Pisum sativum</i> , X60170]                                       | F: CAGTTTGGTACATTGGAGGCG<br>R: GGGTCCTGATTTGCAGTGGTCT      |
| <b><i>Primary metabolism genes</i></b>                                                 |                                                            |
| 3-deoxy-D-arabino-heptulosonate [ <i>Petroselinum crispum</i> , AF012864]              | F: GATGCTATCAGGGCTGAAGTCAA<br>R: CCTAGATCATCAAAAGTCACGGTTC |
| 5-enolpyruvylshikimate 3-phosphate synthase [ <i>Camptotheca acuminata</i> , AY639815] | F: TAGGAGCAACAGTTGAAGAGGGT<br>R: ATCTGAACAGGCAGCAAGAGAGA   |



**Table S6. continued.**

| <b>Putative gene identification</b>                                        | <b>Sequence for forward (F) and reverse (R) primers (5'→3')</b> |
|----------------------------------------------------------------------------|-----------------------------------------------------------------|
| <i>Secondary metabolism genes</i>                                          |                                                                 |
| 4-coumarate-coa ligase [ <i>Populus trichocarpa</i> , XM_002304328]        | F: GGGACTACTGGGACTTCCAAAG<br>R: AGCCAAATAAACCATCTCCCAGC         |
| Phenylalanine ammonia-lyase (gDcPAL1) [ <i>Daucus carota</i> , D85850]     | F: AGGGCAAACCCGAATTTACTGAC<br>R: CATAAGAGCTTCCATCCAAGATG        |
| Trans-cinnamate 4-monooxygenase [ <i>Petroselinum crispum</i> , L38898]    | F: CCTGGAATCATCCTTGCATTGC<br>R: TGTCCCTCCTTTCTCTGCTGTGT         |
| Chalcone synthase 2 [ <i>Daucus carota</i> , AJ006780]                     | F: CCACTATTCGGCTCCCTCGTT<br>R: CTCTGATTTGGAGTGICCCCA            |
| Caffeoyl-CoA 3-O-methyltransferase [ <i>Petroselinum crispum</i> , M69184] | F: TATTCTCTCCTTGCCACTGCTCT<br>R: CCCTCTCTGAAGTCAATTTTGTG        |
| Cinnamyl alcohol dehydrogenase [ <i>Aralia cordata</i> , D13991]           | F: GGAGGCAATGGATCATCTTGGT<br>R: GAGAGGTAAGGTTTCGAGTGGGT         |
| Bergaptol O-methyltransferase [ <i>Glehnia littoralis</i> , AB363638]      | F: CTATGGTTCAACGCATCCTCC<br>R: TGTCCAGCAATAGAGCCACTC            |
